# Supplementary material for: Boron–boron, carbon–carbon and nitrogen–nitrogen bonding in N-heterocyclic carbenes and their diazaboryl and triazole analogues: Wanzlick equilibrium revisited
Source: Royal Society of Chemistry journal article supplement (doi:10.1039/c8nj00296g), 2018-01-01
Supplement: c8nj00296g1.pdf [file c8nj00296g1.pdf]

## Boron-boron, carbon-carbon and nitrogen-nitrogen bonding in N-heterocyclic carbenes and their diazaboryl and triazole analogues; Wanzlick equilibria revisited

Katarzyna Młodzikowska,<sup>a†</sup> Adam A. Rajkiewicz,<sup>a†</sup> Karol Grela,<sup>b</sup> and Bartosz Trzaskowski<sup>a\*</sup>

<sup>a</sup> Centre of New Technologies, University of Warsaw, Banacha 2C, 02-097 Warszawa

<sup>b</sup> Faculty of Chemistry, Biological and Chemical Research Centre, University of Warsaw, Żwirki i Wigury 101, 02-089 Warszawa

<sup>†</sup> These authors contributed equally to this work

### Contents

|                                                                          |   |
|--------------------------------------------------------------------------|---|
| Molecule partitioning scheme in functional SAPT0 calculations .....      | 2 |
| Calculated structural and energetic parameters and partial charges ..... | 2 |
| Table S1 .....                                                           | 2 |
| Table S2 .....                                                           | 3 |
| Table S3 .....                                                           | 4 |
| Table S4 .....                                                           | 4 |
| Table S5 .....                                                           | 5 |
| Table S6 .....                                                           | 6 |
| Table S7 .....                                                           | 6 |
| Table S8 .....                                                           | 7 |
| Geometries in xyz format .....                                           | 8 |

## Molecule partitioning scheme in functional SAPT0 calculations

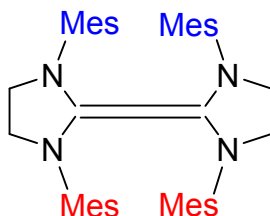

**Figure S1.** Functional SAPT0 partitioning scheme used throughout the study, taking dimer of **2** as an example. For each dimer the intramolecular interaction energy estimation consisted of two independent calculations. In the first one the interaction energy was calculated between the two side groups in blue, with the remainder of the molecule (in red and black) acting as the linker. Second calculations included interaction energy between the two side groups in red, with the remainder of the molecule (in blue and black) acting as the linker.

## Calculated structural and energetic parameters and partial charges

**Table S1.** The comparison of calculated structural and energetic parameters of **1-6** and their dimers at the M06-2X level of theory.

| parameter                                 | <b>1</b> | <b>2</b> | <b>2 dim</b> | <b>3</b> | <b>3 dim</b> | <b>4</b> | <b>4 dim</b> | <b>5</b> | <b>5 dim</b> | <b>6</b> | <b>6 dim</b> |
|-------------------------------------------|----------|----------|--------------|----------|--------------|----------|--------------|----------|--------------|----------|--------------|
| X1-X1' bond length [Å]                    | -        | -        | 1.36         | -        | 1.34         | -        | 1.35         | -        | 1.35         | -        | 1.35         |
| X1-X1' bond order (NBO)                   | 2        | -        | 2            | -        | 2            | -        | 2            | -        | 2            | -        | 2            |
| more stable form <sup>a</sup>             | dim      | -        | mon          | -        | dim          | -        | dim          | -        | mon          | -        | mon          |
| $\Delta G$ DFT (kcal/mol) <sup>b</sup>    | -        | -        | 6.6          | -        | -1.3         | -        | -3.8         | -        | 22.2         | -        | 22.8         |
| $\Delta G$ CCSD(T)(kcal/mol) <sup>b</sup> | -        | -        | 8.0          | -        | -3.5         | -        | -4.2         | -        | 21.9         | -        | 24.2         |
| HOMO-LUMO gap (eV)                        | 2.91     | 7.96     | 5.93         | 9.53     | 7.83         | 9.31     | 7.79         | 9.31     | 6.65         | 9.35     | 6.62         |
| Natural charges                           |          |          |              |          |              |          |              |          |              |          |              |
| X1                                        | -0.14    | 0.24     | 0.28         | 0.22     | 0.27         | 0.22     | 0.26         | 0.13     | 0.25         | 0.13     | 0.25         |
| Imidazole                                 | -0.34    | -0.41    | -0.35        | -0.45    | -0.40        | -0.46    | -0.42        | -0.50    | -0.43        | -0.51    | -0.44        |
| R2                                        | 0.24     | 0.21     | 0.20         | 0.22     | 0.20         | 0.23     | 0.21         | 0.25     | 0.21         | 0.25     | 0.22         |
| R3                                        | 0.24     | 0.21     | 0.16         | 0.22     | 0.20         | 0.23     | 0.21         | 0.25     | 0.21         | 0.25     | 0.22         |
| X1'                                       | -0.14    | -        | 0.28         | -        | 0.27         | -        | 0.26         | -        | 0.25         | -        | 0.25         |
| Imidazole'                                | -0.34    | -        | -0.36        | -        | -0.40        | -        | -0.42        | -        | -0.43        | -        | -0.44        |
| R2'                                       | 0.24     | -        | 0.20         | -        | 0.20         | -        | 0.21         | -        | 0.21         | -        | 0.22         |
| R3'                                       | 0.24     | -        | 0.16         | -        | 0.20         | -        | 0.21         | -        | 0.21         | -        | 0.22         |
| Mulliken partial charges                  |          |          |              |          |              |          |              |          |              |          |              |
| X1                                        | -0.25    | 0.19     | 0.41         | 0.18     | 0.31         | 0.17     | 0.30         | 0.12     | 0.33         | 0.11     | 0.32         |

|            |       |       |       |       |       |       |       |       |       |       |       |
|------------|-------|-------|-------|-------|-------|-------|-------|-------|-------|-------|-------|
| Imidazole  | -0.15 | -0.44 | -0.35 | -0.39 | -0.32 | -0.39 | -0.33 | -0.45 | -0.35 | -0.44 | -0.35 |
| R2         | 0.20  | 0.22  | 0.19  | 0.20  | 0.16  | 0.19  | 0.16  | 0.22  | 0.18  | 0.22  | 0.17  |
| R3         | 0.20  | 0.22  | 0.16  | 0.20  | 0.16  | 0.19  | 0.16  | 0.22  | 0.18  | 0.22  | 0.18  |
| X1'        | -0.25 | -     | 0.40  | -     | 0.31  | -     | 0.31  | -     | 0.33  | -     | 0.31  |
| Imidazole' | -0.15 | -     | -0.35 | -     | -0.32 | -     | -0.32 | -     | -0.35 | -     | -0.35 |
| R2'        | 0.20  | -     | 0.19  | -     | 0.16  | -     | 0.16  | -     | 0.18  | -     | 0.18  |
| R3'        | 0.20  | -     | 0.16  | -     | 0.16  | -     | 0.16  | -     | 0.18  | -     | 0.17  |

<sup>a</sup> dim - dimer, mon – monomer

**Table S2.** The comparison of calculated structural and energetic parameters of **1-6** and their dimers at the M06 level of theory.

| parameter                | 1     | 2     | 2 dim | 3     | 3 dim | 4     | 4 dim | 5     | 5 dim | 6     | 6 dim |
|--------------------------|-------|-------|-------|-------|-------|-------|-------|-------|-------|-------|-------|
| X1-X1' bond length [Å]   | -     | -     | 1.37  | -     | 1.3   | -     | 1.35  | -     | 1.35  | -     | 1.35  |
| X1-X1' bond order (NBO)  | 2     | -     | 2     | -     | 2     | -     | 2     | -     | 2     | -     | 2     |
| HOMO-LUMO gap (eV)       | 2.91  | 5.92  | 4.11  | 7.18  | 5.86  | 7.00  | 5.85  | 6.93  | 4.74  | 6.98  | 4.72  |
| Natural charges          |       |       |       |       |       |       |       |       |       |       |       |
| X1                       | -0.14 | 0.24  | 0.29  | 0.23  | 0.27  | 0.22  | 0.26  | 0.14  | 0.25  | 0.14  | 0.25  |
| Imidazole                | -0.34 | -0.42 | -0.36 | -0.44 | -0.40 | -0.46 | -0.42 | -0.50 | -0.42 | -0.50 | -0.44 |
| R2                       | 0.24  | 0.21  | 0.20  | 0.22  | 0.20  | 0.23  | 0.15  | 0.25  | 0.21  | 0.25  | 0.22  |
| R3                       | 0.24  | 0.21  | 0.16  | 0.22  | 0.20  | 0.23  | 0.15  | 0.25  | 0.21  | 0.25  | 0.22  |
| X1'                      | -0.14 | -     | 0.28  | -     | 0.27  | -     | 0.26  | -     | 0.25  | -     | 0.25  |
| Imidazole'               | -0.34 | -     | -0.36 | -     | -0.40 | -     | -0.42 | -     | -0.42 | -     | -0.44 |
| R2'                      | 0.24  | -     | 0.20  | -     | 0.20  | -     | 0.15  | -     | 0.21  | -     | 0.22  |
| R3'                      | 0.24  | -     | 0.16  | -     | 0.20  | -     | 0.15  | -     | 0.21  | -     | 0.22  |
| Mulliken partial charges |       |       |       |       |       |       |       |       |       |       |       |
| X1                       | -0.25 | 0.17  | 0.44  | 0.16  | 0.33  | 0.15  | 0.33  | 0.11  | 0.35  | 0.10  | 0.34  |
| Imidazole                | -0.15 | -0.37 | -0.37 | -0.34 | -0.30 | -0.36 | -0.30 | -0.40 | -0.32 | -0.40 | -0.33 |
| R2                       | 0.20  | 0.21  | 0.20  | 0.17  | 0.15  | 0.18  | 0.15  | 0.20  | 0.16  | 0.20  | 0.17  |
| R3                       | 0.20  | 0.21  | 0.17  | 0.17  | 0.15  | 0.18  | 0.15  | 0.20  | 0.16  | 0.20  | 0.16  |
| X1'                      | -0.25 | -     | 0.43  | -     | 0.33  | -     | 0.33  | -     | 0.35  | -     | 0.34  |
| Imidazole'               | -0.15 | -     | -0.37 | -     | -0.30 | -     | -0.30 | -     | -0.32 | -     | -0.33 |
| R2'                      | 0.20  | -     | 0.20  | -     | 0.15  | -     | 0.15  | -     | 0.16  | -     | 0.17  |
| R3'                      | 0.20  | -     | 0.17  | -     | 0.15  | -     | 0.15  | -     | 0.16  | -     | 0.16  |

**Table S3.** The comparison of calculated structural and energetic parameters of **7-9**, **16** and **17** and their dimers at the M06-2X level of theory.

| parameter                     | 7     | 7 dim | 8     | 8 dim                    | 9     | 9 dim | 16    | 16 dim | 17    | 17 dim |
|-------------------------------|-------|-------|-------|--------------------------|-------|-------|-------|--------|-------|--------|
| X1-X1' bond length [Å]        | -     | 1.35  | -     | 1.35                     | -     | 1.35  | -     | 1.38   | -     | 1.37   |
| X1-X1' bond order (NBO)       | -     | 2     | -     | 2                        | -     | 2     | -     | 2      | -     | 2      |
| more stable form <sup>a</sup> | -     | dim   | -     | dim                      | -     | dim   | -     | mon    | -     | mon    |
| ΔG DFT (kcal/mol)             | -     | -5.4  | -     | -5.9                     | -     | -0.6  | -     | 54.8   | -     | 33.6   |
| ΔG                            | -     | -4.4  | -     | -2.9                     | -     | 0.7   | -     | 55.9   | -     | 37.7   |
| CCSD(T)(kcal/mol)             |       |       |       |                          |       |       |       |        |       |        |
| HOMO-LUMO gap                 | 7.89  | 6.28  | 7.27  | 5.33                     | 7.71  | 5.80  | 5.01  | 3.81   | 6.20  | 4.76   |
|                               |       |       |       | Natural charges          |       |       |       |        |       |        |
| X1                            | 0.22  | 0.30  | 0.22  | 0.27                     | 0.22  | 0.27  | 0.24  | 0.29   | 0.24  | 0.29   |
| imidazole                     | -0.42 | -0.34 | -0.41 | -0.36                    | -0.42 | -0.37 | -0.42 | -0.36  | -0.42 | -0.36  |
| R2                            | 0.21  | 0.19  | 0.20  | 0.18                     | 0.20  | 0.17  | 0.21  | 0.20   | 0.21  | 0.20   |
| R3                            | 0.20  | 0.18  | 0.21  | 0.18                     | 0.22  | 0.19  | 0.21  | 0.16   | 0.21  | 0.16   |
| X1'                           | -     | 0.26  | -     | 0.27                     | -     | 0.27  | -     | 0.28   | -     | 0.28   |
| imidazole'                    | -     | -0.38 | -     | -0.36                    | -     | -0.37 | -     | -0.36  | -     | -0.36  |
| R2'                           | -     | 0.19  | -     | 0.18                     | -     | 0.17  | -     | 0.20   | -     | 0.20   |
| R3'                           | -     | 0.16  | -     | 0.18                     | -     | 0.19  | -     | 0.16   | -     | 0.16   |
|                               |       |       |       | Mulliken partial charges |       |       |       |        |       |        |
| X1                            | 0.19  | 0.35  | 0.19  | 0.37                     | 0.18  | 0.37  | 0.17  | 0.44   | 0.17  | 0.44   |
| imidazole                     | -0.39 | -0.32 | -0.38 | -0.32                    | -0.40 | -0.33 | -0.42 | -0.37  | -0.42 | -0.37  |
| R2                            | 0.22  | 0.16  | 0.22  | 0.16                     | 0.21  | 0.16  | 0.21  | 0.20   | 0.21  | 0.20   |
| R3                            | 0.17  | 0.14  | 0.16  | 0.16                     | 0.19  | 0.17  | 0.21  | 0.17   | 0.21  | 0.17   |
| X1'                           | -     | 0.34  | -     | 0.37                     | -     | 0.37  | -     | 0.43   | -     | 0.43   |
| imidazole'                    | -     | -0.32 | -     | -0.32                    | -     | -0.33 | -     | -0.37  | -     | -0.37  |
| R2'                           | -     | 0.16  | -     | 0.18                     | -     | 0.16  | -     | 0.20   | -     | 0.20   |
| R3'                           | -     | 0.14  | -     | 0.16                     | -     | 0.17  | -     | 0.17   | -     | 0.17   |

<sup>a</sup> dim - dimer, mon – monomer

**Table S4.** The comparison of calculated structural and energetic parameters of **7-9**, **16** and **17** and their dimers at the M06 level of theory.

| parameter               | 7     | 7 dim | 8     | 8 dim           | 9     | 9 dim | 16    | 16 dim | 17    | 17 dim |
|-------------------------|-------|-------|-------|-----------------|-------|-------|-------|--------|-------|--------|
| X1-X1' bond length [Å]  | -     | 1.35  | -     | 1.35            | -     | 1.36  | -     | 1.40   | -     | 1.38   |
| X1-X1' bond order (NBO) | -     | 2     | -     | 2               | -     | 2     | -     | 2      | -     | 2      |
| HOMO-LUMO gap           | 5.81  | 4.42  | 5.15  | 3.43            | 5.66  | 4.03  | 3.33  | 2.37   | 4.54  | 3.16   |
|                         |       |       |       | Natural charges |       |       |       |        |       |        |
| X1                      | 0.22  | 0.30  | 0.22  | 0.27            | 0.22  | 0.27  | 0.24  | 0.29   | 0.24  | 0.29   |
| imidazole               | -0.42 | -0.37 | -0.42 | -0.36           | -0.43 | -0.36 | -0.42 | -0.36  | -0.42 | -0.36  |

|                          |       |       |       |       |       |       |       |       |       |       |
|--------------------------|-------|-------|-------|-------|-------|-------|-------|-------|-------|-------|
| R2                       | 0.21  | 0.19  | 0.21  | 0.18  | 0.21  | 0.17  | 0.21  | 0.20  | 0.21  | 0.20  |
| R3                       | 0.21  | 0.18  | 0.21  | 0.18  | 0.22  | 0.19  | 0.21  | 0.16  | 0.21  | 0.16  |
| X1'                      | -     | 0.26  | -     | 0.27  | -     | 0.27  | -     | 0.28  | -     | 0.28  |
| imidazole'               | -     | -0.37 | -     | -0.36 | -     | -0.36 | -     | -0.36 | -     | -0.36 |
| R2'                      | -     | 0.16  | -     | 0.18  | -     | 0.17  | -     | 0.20  | -     | 0.20  |
| R3'                      | -     | 0.18  | -     | 0.18  | -     | 0.19  | -     | 0.16  | -     | 0.16  |
| Mulliken partial charges |       |       |       |       |       |       |       |       |       |       |
| X1                       | 0.17  | 0.39  | 0.17  | 0.40  | 0.16  | 0.41  | 0.17  | 0.44  | 0.17  | 0.44  |
| imidazole                | -0.37 | -0.30 | -0.37 | -0.33 | -0.38 | -0.34 | -0.42 | -0.37 | -0.42 | -0.37 |
| R2                       | 0.21  | 0.17  | 0.22  | 0.18  | 0.21  | 0.17  | 0.21  | 0.20  | 0.21  | 0.20  |
| R3                       | 0.16  | 0.13  | 0.15  | 0.15  | 0.17  | 0.17  | 0.21  | 0.17  | 0.21  | 0.17  |
| X1'                      | -     | 0.36  | -     | 0.40  | -     | 0.40  | -     | 0.43  | -     | 0.43  |
| imidazole'               | -     | -0.30 | -     | -0.34 | -     | -0.34 | -     | -0.37 | -     | -0.37 |
| R2'                      | -     | 0.18  | -     | 0.19  | -     | 0.17  | -     | 0.20  | -     | 0.20  |
| R3'                      | -     | 0.15  | -     | 0.15  | -     | 0.17  | -     | 0.17  | -     | 0.17  |

**Table S5.** The comparison of calculated structural and energetic parameters of systems **10** and **11** and their dimers at the M06-2X level of theory.

| parameter                              | 10    | 10A   | 10B   | 10C   | 11    | 11A   | 11B   | 11C   |
|----------------------------------------|-------|-------|-------|-------|-------|-------|-------|-------|
| X1-X1' bond length [Å]                 | -     | 1.61  | 1.72  | 1.67  | -     | 1.67  | 1.670 | 1.68  |
| X1-X1' bond order (NBO)                | -     | 1     | 1     | 1     | -     | 1     | 1     | 1     |
| more stable form <sup>a</sup>          | -     | mon   | -     | -     | -     | mon   | -     | -     |
| $\Delta G$ DFT (kcal/mol) <sup>b</sup> | -     | 11.7  | -     | -     | -     | 24.6  | -     | -     |
| $\Delta G$ CCSD(T)(kcal/mol)           | -     | 29.0  | -     | -     | -     | 40.5  | -     | -     |
| HOMO-LUMO gap                          | 4.21  | 2.80  | 7.45  | 2.40  | 4.24  | 1.60  | 7.08  | 2.86  |
| Natural charges                        |       |       |       |       |       |       |       |       |
| X1                                     | 0.21  | 0.32  | 0.69  | 0.67  | 0.13  | 0.47  | 0.59  | 0.57  |
| imidazole                              | -1.10 | -0.77 | -0.37 | -0.50 | -1.15 | -0.62 | -0.41 | -0.52 |
| R2                                     | 0.05  | -0.11 | 0.19  | -0.75 | 0.07  | -0.21 | 0.20  | -0.74 |
| R3                                     | 0.05  | -0.11 | 0.18  | -0.81 | 0.07  | -0.17 | 0.21  | -0.74 |
| X1'                                    | -     | 0.32  | 0.69  | 0.67  | -     | 0.47  | 0.59  | 0.57  |
| imidazole'                             | -     | -0.77 | -0.37 | -0.49 | -     | -0.62 | -0.41 | -0.52 |
| R2'                                    | -     | -0.12 | 0.19  | -0.74 | -     | -0.22 | 0.20  | -0.75 |
| R3'                                    | -     | -0.12 | 0.18  | -0.70 | -     | -0.17 | 0.21  | -0.74 |
| Mulliken partial charges               |       |       |       |       |       |       |       |       |
| X1                                     | -0.07 | 0.30  | 0.41  | 0.41  | -0.11 | 0.32  | 0.36  | 0.34  |
| imidazole                              | -0.92 | -0.60 | -0.32 | -0.46 | -0.96 | -0.54 | -0.36 | -0.53 |
| R2                                     | -0.04 | -0.20 | 0.16  | -0.75 | -0.02 | -0.24 | 0.18  | -0.73 |
| R3                                     | -0.05 | -0.20 | 0.16  | -0.81 | -0.02 | -0.21 | 0.18  | -0.73 |
| X1'                                    | -     | 0.29  | 0.40  | 0.39  | -     | 0.31  | 0.35  | 0.34  |
| imidazole'                             | -     | -0.60 | -0.32 | -0.50 | -     | -0.55 | -0.37 | -0.53 |

|     |   |       |      |       |   |       |      |       |
|-----|---|-------|------|-------|---|-------|------|-------|
| R2' | - | -0.20 | 0.16 | -0.76 | - | -0.25 | 0.19 | -0.75 |
| R3' | - | -0.20 | 0.16 | -0.72 | - | -0.21 | 0.18 | -0.72 |

<sup>a</sup> dim - dimer, mon – monomer <sup>b</sup> – in the 6-31G\*\* basis set

**Table S6.** The comparison of calculated structural and energetic parameters of systems **10** and **11** and their dimers at the M06 level of theory.

| parameter                | 10    | 10A   | 10B   | 10C   | 11    | 11A   | 11B   | 11C   |
|--------------------------|-------|-------|-------|-------|-------|-------|-------|-------|
| X1-X1' bond length [Å]   | -     | 1.63  | 1.71  | 1.670 | -     | 1.67  | 1.69  | 1.68  |
| X1-X1' bond order (NBO)  | -     | 1     | 1     | 1     | -     | 1     | 1     | 1     |
| HOMO-LUMO gap            | 2.57  | 1.67  | 5.68  | 0.63  | 2.62  | 0.90  | 5.31  | 1.70  |
| Natural charges          |       |       |       |       |       |       |       |       |
| X1                       | 0.23  | 0.39  | 0.68  | 0.59  | 0.17  | 0.51  | 0.61  | 0.57  |
| imidazole                | -1.08 | -0.72 | -0.37 | -0.60 | -1.12 | -0.61 | -0.42 | -0.55 |
| R2                       | 0.05  | -0.13 | 0.19  | -0.63 | 0.06  | -0.23 | 0.20  | -0.73 |
| R3                       | 0.04  | -0.15 | 0.18  | -0.77 | 0.06  | -0.16 | 0.21  | -0.71 |
| X1'                      | -     | 0.40  | 0.68  | 0.58  | -     | 0.51  | 0.61  | 0.57  |
| imidazole'               | -     | -0.73 | -0.37 | -0.61 | -     | -0.61 | -0.42 | -0.57 |
| R2'                      | -     | -0.13 | 0.19  | -0.64 | -     | -0.23 | 0.20  | -0.73 |
| R3'                      | -     | -0.14 | 0.18  | -0.75 | -     | -0.16 | 0.21  | -0.70 |
| Mulliken partial charges |       |       |       |       |       |       |       |       |
| X1                       | -0.08 | 0.35  | 0.41  | 0.37  | -0.11 | 0.33  | 0.36  | 0.34  |
| imidazole                | -0.88 | -0.56 | -0.32 | -0.55 | -0.77 | -0.52 | -0.35 | -0.53 |
| R2                       | -0.05 | -0.21 | 0.16  | -0.67 | -0.18 | -0.26 | 0.17  | -0.74 |
| R3                       | -0.07 | -0.23 | 0.16  | -0.78 | -0.04 | -0.21 | 0.17  | -0.73 |
| X1'                      | -     | 0.35  | 0.41  | 0.39  | -     | 0.33  | 0.36  | 0.34  |
| imidazole'               | -     | -0.57 | -0.31 | -0.56 | -     | -0.52 | -0.35 | -0.53 |
| R2'                      | -     | -0.21 | 0.15  | -0.68 | -     | -0.27 | 0.18  | -0.74 |
| R3'                      | -     | -0.22 | 0.16  | -0.76 | -     | -0.21 | 0.17  | -0.73 |

**Table S7.** The comparison of calculated structural and energetic parameters of systems **12** and **13** and their dimers at the M06-2X level of theory.

| parameter                     | 12 | 12A   | 12B   | 12C   | 13 | 13A   | 13B   | 13C   |
|-------------------------------|----|-------|-------|-------|----|-------|-------|-------|
| X1-X1' bond length [Å]        | -  | 1.589 | 1.689 | 1.674 | -  | 1.593 | 1.677 | 1.763 |
| X1-X1' bond order (NBO)       | -  | 2     | 1     | 1     | -  | 2     | 1     | 1     |
| more stable form <sup>a</sup> | -  | mon   | -     | -     | -  | mon   | -     | -     |

|                                        |       |       |                          |       |       |       |       |       |
|----------------------------------------|-------|-------|--------------------------|-------|-------|-------|-------|-------|
| $\Delta G$ DFT (kcal/mol) <sup>b</sup> | -     | 21.6  | -                        | -     | -     | 37.6  | -     | -     |
| $\Delta G$                             | -     | 36.0  | -                        | -     | -     | 55.6  | -     | -     |
| CCSD(T)(kcal/mol)                      |       |       |                          |       |       |       |       |       |
| HOMO-LUMO gap                          | 6.46  | 4.67  | 8.38                     | 2.54  | 6.09  | 4.18  | 8.01  | 4.69  |
|                                        |       |       | Natural charges          |       |       |       |       |       |
| X1                                     | 0.14  | 0.12  | 0.67                     | 0.07  | 0.06  | 0.15  | 0.57  | 0.60  |
| imidazole                              | -1.23 | -1.16 | -0.40                    | -1.75 | -1.27 | -1.15 | -0.45 | -2.03 |
| R2                                     | 0.11  | 0.08  | 0.20                     | -0.08 | 0.14  | 0.09  | 0.22  | 0.01  |
| R3                                     | 0.11  | 0.08  | 0.20                     | -0.18 | 0.14  | 0.07  | 0.22  | 0.02  |
| X1'                                    | -     | 0.12  | 0.67                     | 0.07  | -     | 0.12  | 0.57  | 0.59  |
| imidazole'                             | -     | -1.16 | -0.40                    | -1.75 | -     | -1.18 | -0.45 | -2.03 |
| R2'                                    | -     | 0.08  | 0.20                     | -0.08 | -     | 0.08  | 0.22  | 0.01  |
| R3'                                    | -     | 0.08  | 0.20                     | -0.18 | -     | 0.06  | 0.22  | 0.02  |
|                                        |       |       | Mulliken partial charges |       |       |       |       |       |
| X1                                     | -0.20 | 0.11  | 0.37                     | 0.04  | -0.25 | 0.09  | 0.32  | 0.23  |
| imidazole                              | -1.02 | -0.92 | -0.29                    | -1.45 | -1.07 | -0.92 | -0.35 | -1.67 |
| R2                                     | 0.01  | -0.04 | 0.15                     | -0.22 | 0.04  | -0.03 | 0.17  | -0.16 |
| R3                                     | 0.01  | -0.04 | 0.15                     | -0.33 | 0.04  | -0.04 | 0.17  | -0.16 |
| X1'                                    | -     | 0.11  | 0.37                     | 0.04  | -     | 0.09  | 0.32  | 0.22  |
| imidazole'                             | -     | -0.92 | -0.29                    | -1.45 | -     | -0.92 | -0.35 | -1.68 |
| R2'                                    | -     | -0.04 | 0.15                     | -0.22 | -     | -0.03 | 0.17  | -0.17 |
| R3'                                    | -     | -0.04 | 0.15                     | -0.33 | -     | -0.06 | 0.17  | -0.16 |

<sup>a</sup> dim - dimer, mon – monomer <sup>b</sup> – in the 6-31G\*\* basis set

**Table S8.** The comparison of calculated structural and energetic parameters of systems **12** and **13** and their dimers at the M06 level of theory.

| parameter               | 12    | 12A   | 12B             | 12C   | 13    | 13A   | 13B   | 13C   |
|-------------------------|-------|-------|-----------------|-------|-------|-------|-------|-------|
| X1-X1' bond length [Å]  | -     | 1.59  | 1.69            | 1.67  | -     | 1.59  | 1.68  | 1.76  |
| X1-X1' bond order (NBO) | -     | 2     | 1               | 1     | -     | 2     | 1     | 1     |
| HOMO-LUMO gap           | 4.61  | 3.00  | 6.35            | 1.35  | 4.18  | 2.51  | 6.08  | 2.88  |
|                         |       |       | Natural charges |       |       |       |       |       |
| X1                      | 0.15  | 0.16  | 0.66            | 0.18  | 0.09  | 0.18  | 0.59  | 0.60  |
| imidazole               | -1.22 | -1.13 | -0.39           | -1.66 | -1.26 | -1.14 | -0.44 | -1.98 |
| R2                      | 0.11  | 0.06  | 0.20            | -0.13 | 0.13  | 0.08  | 0.22  | -0.02 |
| R3                      | 0.11  | 0.06  | 0.20            | -0.22 | 0.13  | 0.05  | 0.22  | 0.00  |
| X1'                     | -     | 0.16  | 0.66            | 0.18  | -     | 0.16  | 0.59  | 0.59  |
| imidazole'              | -     | -1.13 | -0.39           | -1.66 | -     | -1.12 | -0.44 | -1.99 |
| R2'                     | -     | 0.06  | 0.20            | -0.13 | -     | 0.07  | 0.22  | -0.01 |
| R3'                     | -     | 0.06  | 0.20            | -0.22 | -     | 0.05  | 0.22  | 0.00  |

## Mulliken partial charges

|            |       |       |       |       |       |       |       |       |
|------------|-------|-------|-------|-------|-------|-------|-------|-------|
| X1         | -0.21 | 0.14  | 0.36  | 0.09  | -0.24 | 0.13  | 0.32  | 0.23  |
| imidazole  | -0.98 | -0.87 | -0.25 | -1.37 | -1.02 | -0.88 | -0.30 | -1.60 |
| R2         | -0.01 | -0.06 | 0.13  | -0.27 | 0.01  | -0.04 | 0.15  | -0.21 |
| R3         | -0.01 | -0.06 | 0.13  | -0.36 | 0.01  | -0.07 | 0.15  | 0.19  |
| X1'        | -     | 0.14  | 0.36  | 0.09  | -     | 0.10  | 0.32  | 0.21  |
| imidazole' | -     | -0.87 | -0.25 | -1.37 | -     | -0.86 | -0.30 | -1.60 |
| R2'        | -     | -0.06 | 0.13  | -0.27 | -     | -0.06 | 0.15  | -0.20 |
| R3'        | -     | -0.06 | 0.13  | -0.36 | -     | -0.08 | 0.15  | -0.20 |

## Geometries in xyz format

```

130
D1
B1 5.6073 11.9795 3.8713
B2 4.1595 12.1489 3.9926
C1_1 7.0767 11.8340 3.7572
N2_1 8.0532 12.7190 4.1784
C3_1 9.3198 12.2280 3.8915
H3_1 10.2067 12.7945 4.1380
C4_1 9.1619 11.0283 3.2996
H4_1 9.8812 10.3077 2.9360
N5_1 7.7970 14.0576 3.2069
C1_2 2.6895 12.2861 4.1056
N2_2 1.8937 13.3505 3.7194
C3_2 0.5574 13.0920 3.9945
H3_2 -0.2088 13.8216 3.7728
C4_2 0.4901 11.8634 4.5428
H4_2 -0.3499 11.2762 4.8858
N5_2 1.7867 11.3721 4.6192
C1_3 7.8119 14.0576 4.6006
C2_3 7.9698 14.3694 5.9601
C3_3 7.8008 15.6994 6.3387
H3_3 7.9147 15.9808 7.3836
C4_3 7.4770 16.6705 5.3987
H4_3 7.3445 17.7037 5.7151
C5_3 7.3184 16.3326 4.0627
H5_3 7.0621 17.1026 3.3357
C6_3 7.4953 15.0179 3.6307
C1_4 8.2647 13.2816 6.9736
H1_4 8.8691 12.5119 6.4727
C2_4 6.9633 12.6137 7.4248
H2A_4 6.3270 13.3391 7.9519
H2B_4 7.1731 11.7833 8.1122
H2C_4 6.3863 12.2234 6.5747
C3_4 9.0578 13.7744 8.1776
H3A_4 9.9643 14.3148 7.8797
H3B_4 9.3572 12.9251 8.8029
H3C_4 8.4592 14.4414 8.8119
C1_5 7.3721 14.6762 2.1606
H1_5 7.4856 13.5895 2.0464
C2_5 8.4839 15.3395 1.3499
H2A_5 8.4175 16.4346 1.3984
H2B_5 8.4135 15.0483 0.2942
H2C_5 9.4760 15.0480 1.7175
C3_5 5.9907 15.0399 1.6273
H3A_5 5.2127 14.5405 2.2215
H3B_5 5.8887 14.7188 0.5815
H3C_5 5.8115 16.1231 1.6595
C1_6 7.2503 9.5332 2.8092
C2_6 7.1568 9.2466 1.4372
C3_6 6.6830 7.9879 1.0737
H3_6 6.5970 7.7281 0.0206
C4_6 6.3094 7.0615 2.0399
H4_6 5.9364 6.0855 1.7347
C5_6 6.4113 7.3708 3.3879
H5_6 6.1211 6.6340 4.1365
C6_6 6.9000 8.6102 3.8038
C1_7 7.5236 10.2902 0.4007
H1_7 8.3266 10.9123 0.8214
C2_7 6.3328 11.2127 0.1299
H2A_7 5.5052 10.6445 -0.3181
H2B_7 6.6153 12.0102 -0.5707
H2C_7 5.9561 11.6776 1.0517
C3_7 8.0444 9.6930 -0.9009
H3A_7 8.8586 8.9790 -0.7283
H3B_7 8.4215 10.4883 -1.5543
H3C_7 7.2516 9.1742 -1.4557
C1_8 7.0784 8.9012 5.2784
H1_8 7.4262 9.9377 5.3870
C2_8 8.1481 7.9920 5.8805
H2A_8 7.8518 6.9357 5.8300
H2B_8 8.3128 8.2407 6.9363
H2C_8 9.1048 8.0965 5.3526
C3_8 5.7552 8.7932 6.0265
H3A_8 5.0148 9.4711 5.5811
H3B_8 5.8887 9.0693 7.0814
H3C_8 5.3518 7.7719 5.9998
C1_9 2.3725 14.6226 3.2908
C2_9 2.2720 14.9493 1.9282
C3_9 2.6927 16.2193 1.5402
H3_9 2.6313 16.5111 0.4938
C4_9 3.2014 17.1154 2.4726
H4_9 3.5307 18.1009 2.1480
C5_9 3.2941 16.7642 3.8112
H5_9 3.6943 17.4765 4.5321
C6_9 2.8674 15.5115 4.2534
C1_10 1.7665 13.9338 0.9220
H1_10 1.0367 13.2886 1.4332
C2_10 2.9144 13.0373 0.4507
H2A_10 3.6611 13.6312 -0.0958
H2B_10 2.5405 12.2567 -0.2259
H2C_10 3.4289 12.5514 1.2915
C3_10 1.0599 14.5651 -0.2714

```



|        |         |         |         |        |         |        |         |
|--------|---------|---------|---------|--------|---------|--------|---------|
| H3A_10 | 0.2721  | 15.2619 | 0.0385  | H28    | 14.4043 | 8.8577 | 5.7468  |
| H3B_10 | 0.6015  | 13.7856 | -0.8911 | H29    | 14.1922 | 7.1183 | 5.8714  |
| H3C_10 | 1.7613  | 15.1118 | -0.9153 | C30    | 11.5086 | 7.1727 | 2.3975  |
| C1_11  | 2.9145  | 15.1645 | 5.7259  | C31    | 10.4566 | 6.2551 | 2.2650  |
| H1_11  | 2.5763  | 14.1263 | 5.8469  | C32    | 10.3690 | 5.5143 | 1.0903  |
| C2_11  | 1.9608  | 16.0534 | 6.5218  | H33    | 9.5575  | 4.7932 | 0.9803  |
| H2A_11 | 2.2541  | 17.1100 | 6.4637  | C34    | 11.2873 | 5.6693 | 0.0524  |
| H2B_11 | 1.9616  | 15.7660 | 7.5805  | C35    | 12.3263 | 6.5804 | 0.2192  |
| H2C_11 | 0.9324  | 15.9709 | 6.1472  | H36    | 13.0670 | 6.6976 | -0.5733 |
| C3_11  | 4.3400  | 15.2349 | 6.2608  | C37    | 12.4548 | 7.3407 | 1.3810  |
| H3A_11 | 4.9929  | 14.5720 | 5.6771  | C38    | 9.4654  | 6.0620 | 3.3723  |
| H3B_11 | 4.3704  | 14.9147 | 7.3112  | H39    | 8.6816  | 5.3559 | 3.0798  |
| H3C_11 | 4.7462  | 16.2543 | 6.2118  | H40    | 8.9831  | 7.0080 | 3.6526  |
| C1_12  | 2.0897  | 10.0188 | 4.9435  | H41    | 9.9614  | 5.6889 | 4.2762  |
| C2_12  | 2.1207  | 9.6453  | 6.2961  | C42    | 11.1458 | 4.8799 | -1.2149 |
| C3_12  | 2.3427  | 8.3010  | 6.5873  | H43    | 10.7662 | 3.8707 | -1.0181 |
| H3_12  | 2.3739  | 7.9718  | 7.6240  | H44    | 12.1027 | 4.7858 | -1.7394 |
| C4_12  | 2.5364  | 7.3757  | 5.5685  | H45    | 10.4402 | 5.3584 | -1.9067 |
| H4_12  | 2.7135  | 6.3304  | 5.8163  | C46    | 13.5975 | 8.2978 | 1.5435  |
| C5_12  | 2.5093  | 7.7747  | 4.2402  | H47    | 14.4248 | 8.0358 | 0.8760  |
| H5_12  | 2.6645  | 7.0401  | 3.4505  | H48    | 13.9689 | 8.2989 | 2.5754  |
| C6_12  | 2.2719  | 9.1058  | 3.8970  | H49    | 13.3052 | 9.3298 | 1.3043  |
| C1_13  | 1.9668  | 10.6853 | 7.3882  | 98     |         |        |         |
| H1_13  | 1.2977  | 11.4727 | 7.0114  | D2 dim |         |        |         |
| C2_13  | 3.3186  | 11.3401 | 7.6833  | N1     | 13.4768 | 6.4266 | 5.8460  |
| H2A_13 | 4.0215  | 10.5952 | 8.0831  | N2     | 13.1455 | 5.5993 | 3.7330  |
| H2B_13 | 3.2075  | 12.1374 | 8.4303  | C3     | 13.5043 | 5.2339 | 5.0601  |
| H2C_13 | 3.7714  | 11.7709 | 6.7793  | C4     | 12.9725 | 7.5325 | 5.0359  |
| C3_13  | 1.3501  | 10.1329 | 8.6673  | H5     | 13.7803 | 8.2178 | 4.7228  |
| H3A_13 | 0.4119  | 9.5992  | 8.4741  | H6     | 12.2407 | 8.1216 | 5.6055  |
| H3B_13 | 1.1395  | 10.9507 | 9.3664  | C7     | 12.3547 | 6.8246 | 3.8379  |
| H3C_13 | 2.0323  | 9.4428  | 9.1809  | H8     | 11.2942 | 6.5876 | 4.0225  |
| C1_14  | 2.1838  | 9.5135  | 2.4415  | H9     | 12.4215 | 7.4014 | 2.9111  |
| H1_14  | 2.0617  | 10.6040 | 2.3937  | C10    | 13.3757 | 6.5979 | 7.2588  |
| C2_14  | 0.9624  | 8.8849  | 1.7737  | C11    | 12.1840 | 6.3118 | 7.9454  |
| H2A_14 | 1.0317  | 7.7890  | 1.7613  | C12    | 12.0740 | 6.6539 | 9.2924  |
| H2B_14 | 0.8778  | 9.2247  | 0.7335  | H13    | 11.1453 | 6.4280 | 9.8192  |
| H2C_14 | 0.0361  | 9.1555  | 2.2964  | C14    | 13.1156 | 7.2709 | 9.9795  |
| C3_14  | 3.4700  | 9.1757  | 1.6973  | C15    | 14.2822 | 7.5586 | 9.2778  |
| H3A_14 | 4.3280  | 9.6505  | 2.1936  | H16    | 15.1101 | 8.0463 | 9.7961  |
| H3B_14 | 3.4206  | 9.5426  | 0.6628  | C17    | 14.4297 | 7.2427 | 7.9289  |
| H3C_14 | 3.6475  | 8.0926  | 1.6553  | C18    | 11.0438 | 5.6327 | 7.2558  |
| 49     |         |         |         | H19    | 10.1473 | 5.6261 | 7.8847  |
| M2     |         |         |         | H20    | 11.3032 | 4.5928 | 7.0186  |
| N1     | 11.6403 | 8.4770  | 5.6571  | H21    | 10.7891 | 6.1173 | 6.3041  |
| N2     | 11.6076 | 7.9608  | 3.5776  | C22    | 13.0074 | 7.5828 | 11.4417 |
| C3     | 11.8183 | 7.4406  | 4.8075  | H23    | 11.9634 | 7.6714 | 11.7595 |
| C4     | 11.4464 | 9.7866  | 4.9979  | H24    | 13.5213 | 8.5177 | 11.6934 |
| H5     | 12.3725 | 10.3796 | 5.0662  | H25    | 13.4660 | 6.7906 | 12.0493 |
| H6     | 10.6428 | 10.3618 | 5.4725  | C26    | 15.7006 | 7.6053 | 7.2233  |
| C7     | 11.1271 | 9.3596  | 3.5758  | H27    | 16.3979 | 8.0976 | 7.9109  |
| H8     | 10.0473 | 9.3834  | 3.3574  | H28    | 15.5212 | 8.2852 | 6.3813  |
| H9     | 11.6375 | 9.9603  | 2.8139  | H29    | 16.2003 | 6.7168 | 6.8189  |
| C10    | 11.9391 | 8.4155  | 7.0467  | C30    | 14.0308 | 5.5070 | 2.6112  |
| C11    | 10.9023 | 8.5694  | 7.9751  | C31    | 13.4506 | 5.1760 | 1.3705  |
| C12    | 11.2133 | 8.5317  | 9.3327  | C32    | 14.2670 | 5.0104 | 0.2554  |
| H13    | 10.4089 | 8.6383  | 10.0624 | H33    | 13.8056 | 4.7276 | -0.6928 |
| C14    | 12.5189 | 8.3447  | 9.7797  | C34    | 15.6473 | 5.1728 | 0.3221  |
| C15    | 13.5265 | 8.1817  | 8.8309  | C35    | 16.1904 | 5.5841 | 1.5353  |
| H16    | 14.5526 | 8.0209  | 9.1652  | H36    | 17.2622 | 5.7826 | 1.5985  |
| C17    | 13.2620 | 8.2176  | 7.4640  | C37    | 15.4095 | 5.7906 | 2.6743  |
| C18    | 9.4835  | 8.7442  | 7.5228  | C38    | 11.9669 | 5.0393 | 1.2179  |
| H19    | 8.7830  | 8.4607  | 8.3150  | H39    | 11.7187 | 4.4337 | 0.3389  |
| H20    | 9.2729  | 8.1335  | 6.6364  | H40    | 11.4886 | 6.0197 | 1.0827  |
| H21    | 9.2628  | 9.7873  | 7.2561  | H41    | 11.5145 | 4.5751 | 2.0992  |
| C22    | 12.8324 | 8.3348  | 11.2465 | C42    | 16.5144 | 4.9035 | -0.8704 |
| H23    | 13.7542 | 7.7818  | 11.4567 | H43    | 17.4706 | 5.4330 | -0.8014 |
| H24    | 12.0231 | 7.8774  | 11.8268 | H44    | 16.0245 | 5.2064 | -1.8031 |
| H25    | 12.9692 | 9.3535  | 11.6322 | H45    | 16.7422 | 3.8330 | -0.9599 |
| C26    | 14.3606 | 8.0261  | 6.4629  | C46    | 16.0583 | 6.4145 | 3.8738  |
| H27    | 15.3346 | 7.9529  | 6.9571  | H47    | 17.1503 | 6.3955 | 3.7795  |

H48 15.7875 5.9330 4.8146  
H49 15.7591 7.4685 3.9622  
N50 14.2679 3.6098 6.7441  
N51 13.6594 2.7571 4.7002  
C52 13.7893 3.9671 5.4525  
C53 13.8687 2.2189 6.9600  
H54 12.8361 2.1683 7.3431  
H55 14.5308 1.7391 7.6871  
C56 13.9646 1.6187 5.5645  
H57 14.9750 1.2128 5.3771  
H58 13.2422 0.8100 5.3947  
C59 15.5593 3.9748 7.2478  
C60 16.7333 4.0134 6.4692  
C61 17.9159 4.4632 7.0613  
H62 18.8161 4.5141 6.4452  
C63 17.9938 4.8121 8.4053  
C64 16.8472 4.6597 9.1794  
H65 16.8855 4.8894 10.2459  
C66 15.6385 4.2434 8.6298  
C67 16.8133 3.4862 5.0658  
H68 17.7043 3.8708 4.5553  
H69 15.9410 3.7244 4.4562  
H70 16.8994 2.3905 5.0793  
C71 19.2617 5.3450 9.0012  
H72 19.2449 6.4418 9.0502  
H73 20.1364 5.0607 8.4067  
H74 19.4122 4.9804 10.0240  
C75 14.4526 4.0487 9.5238  
H76 14.5665 4.6182 10.4532  
H77 14.3335 2.9919 9.8018  
H78 13.5254 4.3612 9.0334  
C79 12.8568 2.4711 3.5555  
C80 13.5040 2.0190 2.3926  
C81 12.7365 1.5838 1.3148  
H82 13.2452 1.2454 0.4103  
C83 11.3454 1.5708 1.3579  
C84 10.7230 2.0085 2.5233  
H85 9.6332 2.0003 2.5834  
C86 11.4538 2.4573 3.6229  
C87 14.9986 1.9936 2.2930  
H88 15.3146 1.6450 1.3031  
H89 15.4500 1.3309 3.0429  
H90 15.4232 2.9930 2.4478  
C91 10.5476 1.1353 0.1659  
H92 11.0203 0.2915 -0.3498  
H93 10.4562 1.9489 -0.5661  
H94 9.5324 0.8373 0.4478  
C95 10.7361 2.9261 4.8474  
H96 9.6640 2.7109 4.7862  
H97 10.8642 4.0080 4.9766  
H98 11.1285 2.4559 5.7581  
17

M3

N1 11.9140 8.7456 5.5251  
N2 11.2262 8.1070 3.6057  
C3 11.7655 7.6479 4.7543  
C4 11.4148 9.9982 4.9444  
H5 12.1861 10.7806 4.9704  
H6 10.5506 10.3698 5.5170  
C7 11.0451 9.5618 3.5293  
H8 10.0130 9.8173 3.2514  
H9 11.7077 9.9920 2.7620  
C10 10.9732 7.2960 2.4489  
H11 11.1914 6.2577 2.7085  
H12 9.9243 7.3726 2.1268  
C13 12.3749 8.7244 6.8842  
H14 12.6750 7.7021 7.1244  
H15 13.2359 9.3940 7.0262  
H16 11.5859 9.0385 7.5849  
H17 11.6080 7.5922 1.5994  
34

D3 dim

N1 12.2823 5.5531 6.5113  
N2 12.0888 4.9319 4.2518  
C3 12.0279 6.0050 5.1857  
C4 12.2514 4.0918 6.4368  
H5 11.2318 3.7275 6.6352  
H6 12.9206 3.6512 7.1840  
C7 12.6526 3.8029 4.9933  
H8 13.7485 3.7962 4.8901  
H9 12.2693 2.8533 4.6041  
C10 10.8438 4.6566 3.5504  
H11 10.5301 5.5630 3.0220  
H12 11.0078 3.8655 2.8100  
C13 13.4663 6.1209 7.1384  
H14 13.3675 7.2116 7.1544  
H15 13.5380 5.7665 8.1730  
N24 11.5674 8.3292 5.8044  
N25 11.6463 7.7634 3.5233  
C26 11.7637 7.2833 4.8585  
C27 11.5777 9.5668 5.0233  
H28 12.6012 9.9686 4.9707  
H29 10.9390 10.3249 5.4897  
C30 11.1058 9.1183 3.6434  
H31 10.0062 9.0886 3.6013  
H32 11.4600 9.7511 2.8222  
C33 12.8531 7.6424 2.7190  
H34 13.1511 6.5889 2.6878  
H35 12.6450 7.9722 1.6948  
C36 10.4207 8.1556 6.6835  
H37 10.5326 7.2104 7.2254  
H38 10.3938 8.9710 7.4153  
H33 9.4568 8.1352 6.1420  
H36 13.7002 8.2327 3.1149  
H39 14.4036 5.8634 6.6111  
H40 10.0245 4.3450 4.2246  
23

M4

N1 11.9767 8.7690 5.4954  
N2 11.1552 8.1095 3.6294  
C3 11.7620 7.6634 4.7502  
C4 11.3784 9.9974 4.9518  
H5 12.0718 10.8454 5.0212  
H6 10.4637 10.2654 5.5043  
C7 11.0750 9.5739 3.5202  
H8 10.0867 9.8957 3.1677  
H9 11.8256 9.9556 2.8099  
C10 10.9478 7.2698 2.4701  
H11 10.8366 6.2474 2.8466  
H12 9.9973 7.5513 1.9912  
C13 12.4162 8.7078 6.8721  
H14 13.0018 7.7871 6.9664  
H15 13.0939 9.5529 7.0687  
C16 12.0910 7.3407 1.4715  
H17 11.9184 6.6677 0.6245  
H18 12.2187 8.3526 1.0689  
H19 13.0267 7.0484 1.9616  
C20 11.2664 8.7038 7.8656  
H21 11.6340 8.6193 8.8942  
H22 10.6694 9.6214 7.8026  
H23 10.6060 7.8530 7.6626  
45

D4 dim

N1 12.3259 5.5545 6.5036  
N2 12.0480 4.9215 4.2652  
C3 12.0289 6.0033 5.1874  
C4 12.3235 4.0926 6.4567  
H5 11.3456 3.7017 6.7762  
H6 13.0819 3.6826 7.1345  
C7 12.5850 3.7670 4.9848  
H8 13.6636 3.6633 4.7918  
H9 12.0982 2.8427 4.6510

|        |         |         |        |        |         |         |        |
|--------|---------|---------|--------|--------|---------|---------|--------|
| C10    | 10.8144 | 4.7025  | 3.5094 | N16    | 11.5461 | 8.3949  | 5.7447 |
| H11    | 10.5946 | 5.6377  | 2.9772 | N17    | 11.6810 | 7.8783  | 3.4851 |
| H12    | 11.0252 | 3.9446  | 2.7421 | C18    | 11.8723 | 7.3779  | 4.8038 |
| C13    | 13.4797 | 6.1832  | 7.1481 | C19    | 11.1410 | 9.4991  | 4.9611 |
| H14    | 13.2878 | 7.2645  | 7.1626 | C20    | 11.2505 | 9.2133  | 3.6615 |
| H15    | 13.4962 | 5.8516  | 8.1956 | C21    | 10.6631 | 8.0091  | 6.8342 |
| C16    | 9.6178  | 4.2846  | 4.3519 | H22    | 10.4594 | 8.8846  | 7.4598 |
| H17    | 8.7069  | 4.2305  | 3.7447 | H23    | 9.7084  | 7.6020  | 6.4618 |
| H18    | 9.7655  | 3.2981  | 4.8109 | H24    | 11.1397 | 7.2396  | 7.4509 |
| H19    | 9.4457  | 5.0083  | 5.1593 | H25    | 11.0774 | 9.8433  | 2.7987 |
| C20    | 14.8171 | 5.8960  | 6.4808 | H26    | 10.7897 | 10.4028 | 5.4422 |
| H21    | 15.6239 | 6.4702  | 6.9505 | C27    | 12.7741 | 7.6650  | 2.5491 |
| H22    | 15.0879 | 4.8340  | 6.5481 | H28    | 13.7184 | 8.0989  | 2.9179 |
| H23    | 14.7817 | 6.1669  | 5.4175 | H29    | 12.9329 | 6.5924  | 2.3942 |
| N24    | 11.5232 | 8.3247  | 5.7987 | H30    | 12.5201 | 8.1248  | 1.5881 |
| N25    | 11.6879 | 7.7775  | 3.5269 | 21     |         |         |        |
| C26    | 11.7634 | 7.2854  | 4.8587 | M6     |         |         |        |
| C27    | 11.5037 | 9.5765  | 5.0425 | N1     | 11.9745 | 8.8052  | 5.4684 |
| H28    | 12.4895 | 10.0640 | 5.0842 | N2     | 11.1380 | 8.1485  | 3.6410 |
| H29    | 10.7711 | 10.2733 | 5.4674 | C3     | 11.7622 | 7.6580  | 4.7547 |
| C30    | 11.1700 | 9.1426  | 3.6138 | C4     | 11.5041 | 9.9466  | 4.8326 |
| H31    | 10.0823 | 9.1506  | 3.4462 | C7     | 10.9784 | 9.5278  | 3.6594 |
| H32    | 11.6283 | 9.7795  | 2.8476 | C6     | 12.5475 | 8.8029  | 6.8027 |
| C33    | 12.8828 | 7.5851  | 2.7043 | H7     | 13.0811 | 7.8525  | 6.9020 |
| H34    | 13.0902 | 6.5067  | 2.6880 | H8     | 13.2874 | 9.6121  | 6.8715 |
| H35    | 12.6274 | 7.8731  | 1.6751 | H9     | 10.5166 | 10.0782 | 2.8499 |
| C36    | 10.4113 | 8.1051  | 6.7244 | H10    | 11.5796 | 10.9357 | 5.2657 |
| H37    | 10.6193 | 7.1677  | 7.2574 | C11    | 10.7774 | 7.3095  | 2.5120 |
| H38    | 10.4400 | 8.9078  | 7.4743 | H12    | 10.7367 | 6.2854  | 2.8958 |
| C39    | 14.1109 | 8.3483  | 3.1788 | H13    | 9.7676  | 7.5826  | 2.1762 |
| H40    | 14.9935 | 8.0872  | 2.5837 | C14    | 11.7785 | 7.4267  | 1.3789 |
| H41    | 13.9725 | 9.4348  | 3.1017 | H15    | 11.5033 | 6.7781  | 0.5406 |
| H42    | 14.3263 | 8.1108  | 4.2286 | H16    | 11.8364 | 8.4567  | 1.0064 |
| C43    | 9.0398  | 8.0425  | 6.0675 | H17    | 12.7750 | 7.1387  | 1.7308 |
| H44    | 8.2643  | 7.7808  | 6.7964 | C18    | 11.4838 | 8.9448  | 7.8744 |
| H45    | 8.7573  | 9.0040  | 5.6186 | H19    | 11.9273 | 8.9267  | 8.8754 |
| H46    | 9.0292  | 7.2850  | 5.2729 | H20    | 10.9337 | 9.8872  | 7.7639 |
| 15     |         |         |        | H21    | 10.7640 | 8.1229  | 7.7962 |
| M5     |         |         |        | 42     |         |         |        |
| N1     | 11.7583 | 8.5252  | 5.6212 | D6 dim |         |         |        |
| N2     | 11.4723 | 7.9609  | 3.6028 | N1     | 11.4204 | 5.5916  | 6.5395 |
| C3     | 11.8187 | 7.4225  | 4.8126 | N2     | 11.9035 | 4.7692  | 4.4213 |
| C4     | 11.3947 | 9.6841  | 4.9486 | C3     | 11.8533 | 5.9446  | 5.2259 |
| C7     | 11.2118 | 9.3234  | 3.6588 | C4     | 11.3690 | 4.1733  | 6.5335 |
| C6     | 12.0482 | 8.4750  | 7.0352 | C7     | 11.6684 | 3.7078  | 5.3180 |
| H7     | 11.1803 | 8.7873  | 7.6279 | C6     | 10.1894 | 6.2561  | 6.9982 |
| H8     | 12.2982 | 7.4412  | 7.2811 | H7     | 10.0599 | 6.0044  | 8.0604 |
| H9     | 12.8968 | 9.1215  | 7.2880 | H8     | 10.3600 | 7.3397  | 6.9462 |
| H10    | 10.9250 | 9.9045  | 2.7925 | H9     | 11.7591 | 2.6850  | 4.9732 |
| H11    | 11.2994 | 10.6442 | 5.4381 | H10    | 11.0757 | 3.6355  | 7.4261 |
| C12    | 11.3897 | 7.1768  | 2.3927 | C11    | 12.9938 | 4.5961  | 3.4622 |
| H13    | 12.0934 | 7.5426  | 1.6357 | H12    | 12.8428 | 3.6117  | 2.9991 |
| H14    | 11.6442 | 6.1474  | 2.6523 | H13    | 12.8874 | 5.3458  | 2.6691 |
| H15    | 10.3773 | 7.2034  | 1.9727 | C14    | 14.3830 | 4.6951  | 4.0706 |
| 30     |         |         |        | H15    | 15.1455 | 4.3985  | 3.3422 |
| D5 dim |         |         |        | H16    | 14.5972 | 5.7231  | 4.3820 |
| N1     | 12.7885 | 5.7226  | 6.3849 | H17    | 14.4724 | 4.0428  | 4.9492 |
| N2     | 12.3235 | 5.0242  | 4.2206 | C18    | 8.9530  | 5.8742  | 6.2017 |
| C3     | 12.2974 | 6.1321  | 5.1136 | H19    | 8.0838  | 6.4612  | 6.5179 |
| C4     | 13.1182 | 4.3576  | 6.2258 | H20    | 9.1161  | 6.0530  | 5.1311 |
| C7     | 12.8190 | 3.9476  | 4.9909 | H21    | 8.7134  | 4.8119  | 6.3269 |
| C6     | 13.8007 | 6.5729  | 6.9916 | N22    | 12.3602 | 8.3292  | 5.6756 |
| H7     | 14.1221 | 6.1293  | 7.9399 | N23    | 12.2853 | 7.6082  | 3.4679 |
| H8     | 14.6782 | 6.6960  | 6.3352 | C24    | 12.1493 | 7.2014  | 4.8296 |
| H9     | 13.3868 | 7.5672  | 7.1911 | C25    | 12.7930 | 9.3532  | 4.8095 |
| H10    | 12.8910 | 2.9598  | 4.5545 | C26    | 12.7330 | 8.9532  | 3.5367 |
| H11    | 13.5628 | 3.8099  | 7.0466 | C27    | 13.0998 | 8.1645  | 6.9262 |
| C12    | 11.1081 | 4.7766  | 3.4610 | H28    | 13.1694 | 9.1638  | 7.3766 |
| H13    | 11.2437 | 3.8807  | 2.8461 | H29    | 12.5050 | 7.5442  | 7.6073 |
| H14    | 10.2362 | 4.6329  | 4.1205 | H30    | 12.9306 | 9.5084  | 2.6284 |
| H15    | 10.8965 | 5.6259  | 2.8029 | H31    | 13.1267 | 10.2978 | 5.2214 |

|        |         |         |         |      |         |         |         |
|--------|---------|---------|---------|------|---------|---------|---------|
| C32    | 11.0991 | 7.3901  | 2.6237  | H10A | 2.5906  | 1.5591  | 1.9563  |
| H33    | 11.3921 | 7.6090  | 1.5871  | H10B | 4.1664  | 1.8716  | 1.2123  |
| H34    | 10.8559 | 6.3200  | 2.6669  | H10C | 4.0773  | 0.9384  | 2.7028  |
| C35    | 9.8957  | 8.2246  | 3.0289  | C11  | 0.6290  | -2.2449 | -0.5560 |
| H36    | 9.0149  | 7.9597  | 2.4337  | H11A | 0.3275  | -3.0641 | 0.1115  |
| H37    | 9.6553  | 8.0624  | 4.0875  | H11B | 0.6007  | -2.6364 | -1.5795 |
| H38    | 10.0916 | 9.2947  | 2.8943  | H11C | -0.1235 | -1.4534 | -0.4730 |
| C39    | 14.4814 | 7.5541  | 6.7596  | C12  | 5.6072  | -2.9060 | -0.5040 |
| H40    | 15.0409 | 7.6048  | 7.7001  | H12A | 6.3113  | -2.3627 | -1.1475 |
| H41    | 14.4078 | 6.5008  | 6.4686  | H12B | 5.3163  | -3.8290 | -1.0178 |
| H42    | 15.0537 | 8.0860  | 5.9882  | H12C | 6.1536  | -3.1691 | 0.4122  |
| 43     |         |         |         | N2   | 5.8689  | -0.4937 | 0.9496  |
| M7     |         |         |         | C44  | 6.4813  | -1.3853 | 3.1801  |
| C1     | 4.9328  | 1.2064  | 1.7246  | C45  | 6.3223  | -3.4564 | 4.1773  |
| C2     | 4.9909  | 3.3957  | 0.8207  | H46  | 7.1260  | -4.0537 | 3.7220  |
| H2A    | 5.2050  | 3.8017  | -0.1751 | H47  | 5.5823  | -4.1487 | 4.5928  |
| H2B    | 5.3277  | 4.1290  | 1.5729  | C71  | 4.2707  | -2.4125 | 3.4441  |
| C3     | 3.5392  | 2.9989  | 1.0216  | H72  | 3.9453  | -1.4645 | 3.0037  |
| H3A    | 2.9518  | 3.7442  | 1.5693  | H73  | 4.0764  | -2.3219 | 4.5332  |
| H3B    | 3.0218  | 2.7868  | 0.0729  | C74  | 3.4132  | -3.5149 | 2.8811  |
| C4     | 2.5713  | 1.0940  | 2.3629  | C75  | 2.0307  | -3.4383 | 3.0611  |
| C5     | 1.9814  | 1.6358  | 3.5127  | C35  | 1.1893  | -4.4067 | 2.5312  |
| C6     | 0.8700  | 0.9948  | 4.0560  | H36  | 0.1136  | -4.3310 | 2.6796  |
| H6     | 0.4127  | 1.4046  | 4.9583  | C37  | 1.7212  | -5.4719 | 1.8081  |
| C7     | 0.3419  | -0.1621 | 3.4892  | H38  | 1.0644  | -6.2321 | 1.3907  |
| C8     | 0.9605  | -0.6841 | 2.3547  | C39  | 3.0964  | -5.5580 | 1.6286  |
| H8     | 0.5673  | -1.5973 | 1.9054  | H40  | 3.5211  | -6.3859 | 1.0642  |
| C9     | 2.0689  | -0.0731 | 1.7734  | C41  | 3.9375  | -4.5861 | 2.1628  |
| C10    | 2.5403  | 2.8636  | 4.1690  | H42  | 5.0128  | -4.6386 | 2.0018  |
| H10A   | 2.1310  | 3.7852  | 3.7314  | N43  | 5.6963  | -2.5830 | 3.1728  |
| H10B   | 3.6311  | 2.9128  | 4.0659  | C46  | 6.8996  | -2.4692 | 5.1845  |
| H10C   | 2.2915  | 2.8810  | 5.2353  | H45  | 6.1294  | -2.1247 | 5.8938  |
| C11    | -0.8696 | -0.8204 | 4.0798  | H48  | 7.7433  | -2.8679 | 5.7557  |
| H11A   | -0.8725 | -0.7494 | 5.1735  | C47  | 8.7492  | -1.1691 | 4.1969  |
| H11B   | -0.9229 | -1.8803 | 3.8092  | C48  | 9.3858  | -0.5454 | 5.2895  |
| H11C   | -1.7942 | -0.3470 | 3.7247  | C49  | 10.7546 | -0.3056 | 5.2406  |
| C12    | 2.7208  | -0.6596 | 0.5589  | H50  | 11.2305 | 0.1978  | 6.0840  |
| H12A   | 2.7699  | 0.0679  | -0.2622 | C51  | 11.5214 | -0.6547 | 4.1322  |
| H12B   | 2.1712  | -1.5367 | 0.2028  | C52  | 10.8757 | -1.2807 | 3.0727  |
| H12C   | 3.7552  | -0.9504 | 0.7757  | H53  | 11.4605 | -1.5813 | 2.2013  |
| C13    | 7.1197  | 2.0803  | 1.0820  | C54  | 9.5072  | -1.5625 | 3.0773  |
| H13A   | 7.5269  | 2.4686  | 0.1364  | C55  | 8.6080  | -0.1138 | 6.4973  |
| H13B   | 7.4042  | 1.0243  | 1.1603  | H56  | 9.1765  | 0.6169  | 7.0817  |
| C14    | 7.6763  | 2.8669  | 2.2453  | H57  | 8.3735  | -0.9554 | 7.1637  |
| C15    | 8.6366  | 3.8572  | 2.0602  | H58  | 7.6482  | 0.3368  | 6.2189  |
| H15    | 9.0033  | 4.0662  | 1.0550  | C59  | 12.9933 | -0.3690 | 4.0962  |
| C16    | 9.1270  | 4.5800  | 3.1448  | H60  | 13.2059 | 0.6657  | 4.3930  |
| H16    | 9.8759  | 5.3532  | 2.9873  | H61  | 13.4090 | -0.5234 | 3.0948  |
| C17    | 8.6522  | 4.3207  | 4.4244  | H62  | 13.5473 | -1.0174 | 4.7871  |
| H17    | 9.0292  | 4.8882  | 5.2724  | C63  | 8.9457  | -2.2801 | 1.8825  |
| C18    | 7.6873  | 3.3344  | 4.6168  | H64  | 8.2002  | -3.0381 | 2.1454  |
| H18    | 7.3121  | 3.1281  | 5.6170  | H65  | 9.7545  | -2.7806 | 1.3379  |
| C19    | 7.2019  | 2.6132  | 3.5347  | H66  | 8.4459  | -1.5933 | 1.1869  |
| H19    | 6.4442  | 1.8394  | 3.6703  | N67  | 7.3383  | -1.3737 | 4.3146  |
| N1     | 5.6732  | 2.1092  | 1.0384  | C68  | 7.0827  | 1.5068  | 1.0664  |
| N2     | 3.6981  | 1.7499  | 1.7950  | H69  | 8.0463  | 1.9409  | 0.7705  |
| 86     |         |         |         | H70  | 6.3573  | 2.3390  | 1.1465  |
| D7 dim |         |         |         | C72  | 6.9459  | 1.6244  | 3.5009  |
| C1     | 6.4259  | -0.4081 | 2.2442  | H74  | 6.8832  | 0.9585  | 4.3718  |
| C3     | 6.5862  | 0.4421  | 0.0936  | H75  | 5.9655  | 2.1403  | 3.4244  |
| H3A    | 5.9174  | 0.8494  | -0.6738 | C76  | 8.0253  | 2.6480  | 3.7248  |
| H3B    | 7.4318  | -0.0470 | -0.4210 | C77  | 7.7032  | 3.9008  | 4.2437  |
| C4     | 4.5537  | -0.9091 | 0.5977  | C78  | 8.6974  | 4.8343  | 4.5168  |
| C5     | 3.4294  | -0.1439 | 0.9476  | H77  | 8.4298  | 5.8079  | 4.9223  |
| C6     | 2.1672  | -0.5876 | 0.5557  | C79  | 10.0292 | 4.5251  | 4.2647  |
| H6     | 1.2906  | -0.0020 | 0.8386  | H79  | 10.8088 | 5.2542  | 4.4750  |
| C7     | 1.9964  | -1.7522 | -0.1897 | C80  | 10.3572 | 3.2800  | 3.7362  |
| C8     | 3.1294  | -2.4782 | -0.5482 | H81  | 11.3970 | 3.0283  | 3.5328  |
| H8     | 3.0126  | -3.4014 | -1.1186 | C82  | 9.3631  | 2.3485  | 3.4655  |
| C9     | 4.4060  | -2.0805 | -0.1603 | H83  | 9.6157  | 1.3720  | 3.0547  |
| C10    | 3.5702  | 1.1183  | 1.7439  | N84  | 7.1851  | 0.7941  | 2.3351  |

|        |         |         |         |      |         |         |         |
|--------|---------|---------|---------|------|---------|---------|---------|
| H85    | 1.6138  | -2.5970 | 3.6165  | H12B | 4.8668  | 1.3146  | 4.1471  |
| H86    | 6.6582  | 4.1455  | 4.4359  | H12C | 5.5096  | -0.3127 | 3.8641  |
| 43     |         |         |         | N2   | 7.8288  | 0.4587  | 1.5650  |
| M8     |         |         |         | C44  | 7.1389  | -1.8035 | 2.3036  |
| C1     | 3.3458  | 2.4352  | 10.8520 | C45  | 6.3852  | -3.5569 | 3.6287  |
| C3     | 5.3624  | 3.4343  | 10.0921 | H46  | 6.0935  | -4.6125 | 3.5647  |
| H3A    | 5.3930  | 3.5587  | 8.9969  | H47  | 5.7775  | -3.0862 | 4.4256  |
| H3B    | 6.3960  | 3.3842  | 10.4563 | C71  | 4.7766  | -2.4980 | 2.1771  |
| C4     | 4.5218  | 4.5009  | 10.7758 | H72  | 4.7090  | -1.6106 | 1.5354  |
| H4A    | 4.9324  | 4.8013  | 11.7529 | H73  | 4.3321  | -2.1934 | 3.1446  |
| H4B    | 4.3864  | 5.4057  | 10.1724 | C74  | 3.9361  | -3.5864 | 1.5646  |
| C5     | 2.1481  | 4.4336  | 11.6045 | C75  | 2.5526  | -3.4485 | 1.4254  |
| C6     | 1.4029  | 5.3751  | 10.8825 | I35  | 1.5493  | -1.7065 | 2.1483  |
| C8     | 0.3489  | 6.0253  | 11.5222 | C77  | 1.7776  | -4.4130 | 0.7941  |
| H8     | -0.2422 | 6.7504  | 10.9598 | H78  | 0.7043  | -4.2697 | 0.6938  |
| C9     | 0.0219  | 5.7620  | 12.8494 | C79  | 2.3844  | -5.5580 | 0.2894  |
| C10    | 0.7746  | 4.8130  | 13.5381 | H80  | 1.7792  | -6.3135 | -0.2069 |
| H10    | 0.5261  | 4.5869  | 14.5764 | C81  | 3.7566  | -5.7231 | 0.4199  |
| C11    | 1.8405  | 4.1436  | 12.9424 | H82  | 4.2441  | -6.6094 | 0.0192  |
| C12    | 1.7067  | 5.6706  | 9.4436  | C83  | 4.5174  | -4.7467 | 1.0502  |
| H12A   | 2.4992  | 6.4252  | 9.3381  | H84  | 5.5987  | -4.8550 | 1.1351  |
| H12B   | 0.8218  | 6.0649  | 8.9326  | N85  | 6.1725  | -2.8647 | 2.3570  |
| H12C   | 2.0424  | 4.7720  | 8.9138  | C46  | 7.8533  | -3.3543 | 3.9025  |
| C13    | -1.0992 | 6.4944  | 13.5260 | H48  | 8.0863  | -3.3592 | 4.9755  |
| H13A   | -0.7530 | 7.4427  | 13.9580 | H49  | 8.4657  | -4.1369 | 3.4214  |
| H13B   | -1.5291 | 5.9048  | 14.3433 | C48  | 9.5140  | -1.8142 | 3.0697  |
| H13C   | -1.9041 | 6.7360  | 12.8225 | C49  | 10.2530 | -1.2821 | 4.1412  |
| C14    | 2.6260  | 3.1270  | 13.7148 | C50  | 11.6226 | -1.0841 | 3.9886  |
| H14A   | 3.7038  | 3.3346  | 13.6776 | H51  | 12.1870 | -0.6533 | 4.8180  |
| H14B   | 2.4930  | 2.1257  | 13.2892 | C52  | 12.2835 | -1.4088 | 2.8070  |
| H14C   | 2.3183  | 3.1111  | 14.7654 | C53  | 11.5392 | -1.9765 | 1.7778  |
| C15    | 5.0538  | 0.9349  | 9.9385  | H54  | 12.0450 | -2.2705 | 0.8557  |
| H15A   | 4.4338  | 0.1799  | 10.4346 | C55  | 10.1656 | -2.1994 | 1.8833  |
| H15B   | 6.0966  | 0.7631  | 10.2340 | C56  | 9.5907  | -0.9429 | 5.4423  |
| C16    | 4.8848  | 0.8201  | 8.4407  | H57  | 10.2081 | -0.2490 | 6.0244  |
| C17    | 5.9173  | 0.7098  | 7.5114  | H58  | 9.4382  | -1.8394 | 6.0602  |
| C18    | 5.6594  | 0.6197  | 6.1442  | H59  | 8.6067  | -0.4888 | 5.2817  |
| H18    | 6.4823  | 0.5319  | 5.4392  | C60  | 13.7455 | -1.1240 | 2.6347  |
| C19    | 4.3491  | 0.6501  | 5.6875  | H61  | 9.2473  | 2.4662  | 7.2416  |
| H19    | 4.1509  | 0.5804  | 4.6201  | H62  | 13.9038 | -0.1139 | 2.2328  |
| C20    | 3.3010  | 0.7769  | 6.5944  | H63  | 14.2147 | -1.8259 | 1.9359  |
| H20    | 2.2720  | 0.8085  | 6.2434  | C64  | 9.4622  | -2.8440 | 0.7244  |
| C21    | 3.5738  | 0.8622  | 7.9497  | H65  | 8.6462  | -3.5095 | 1.0299  |
| H21    | 2.7693  | 0.9805  | 8.6776  | H66  | 10.1729 | -3.4293 | 0.1298  |
| N1     | 3.2449  | 3.7795  | 10.9736 | H67  | 9.0183  | -2.0864 | 0.0632  |
| N2     | 4.6133  | 2.2168  | 10.4400 | N68  | 8.1206  | -2.0468 | 3.2997  |
| I1     | 7.9725  | 0.6980  | 8.0974  | C69  | 6.8133  | 0.4409  | -0.5266 |
| 86     |         |         |         | H70  | 6.0226  | 0.8907  | -1.1403 |
| D8 dim |         |         |         | H71  | 7.6201  | 0.1063  | -1.2068 |
| C1     | 7.1016  | -0.7549 | 1.4473  | C72  | 6.2280  | -1.9009 | -0.5505 |
| C3     | 7.3647  | 1.3748  | 0.5205  | H74  | 6.3340  | -2.7787 | 0.0990  |
| H3A    | 8.1837  | 1.9993  | 0.1399  | H75  | 7.0823  | -1.9530 | -1.2534 |
| H3B    | 6.5823  | 2.0484  | 0.9125  | C76  | 4.9421  | -2.0370 | -1.3214 |
| C4     | 8.0136  | 1.1059  | 2.8281  | C78  | 4.7400  | -3.0865 | -2.2217 |
| C5     | 9.2697  | 1.6941  | 3.0618  | I77  | 6.2819  | -4.5162 | -2.5977 |
| C6     | 9.4887  | 2.3721  | 4.2574  | C80  | 3.5326  | -3.2635 | -2.8851 |
| H6     | 10.4726 | 2.8079  | 4.4424  | H79  | 3.4053  | -4.0970 | -3.5719 |
| C7     | 8.4937  | 2.4945  | 5.2246  | C82  | 2.4894  | -2.3717 | -2.6603 |
| C8     | 7.2445  | 1.9492  | 4.9482  | H81  | 1.5425  | -2.5101 | -3.1775 |
| H8     | 6.4400  | 2.0653  | 5.6773  | C84  | 2.6653  | -1.3172 | -1.7748 |
| C9     | 6.9738  | 1.2637  | 3.7622  | H83  | 1.8524  | -0.6203 | -1.5818 |
| C10    | 10.3624 | 1.6068  | 2.0392  | C85  | 3.8781  | -1.1568 | -1.1169 |
| H10A   | 11.3360 | 1.8336  | 2.4889  | H85  | 4.0168  | -0.3472 | -0.4005 |
| H10B   | 10.2062 | 2.3243  | 1.2206  | N86  | 6.3090  | -0.6907 | 0.2518  |
| H10C   | 10.4064 | 0.6087  | 1.5895  | 47   |         |         |         |
| C11    | 8.7735  | 3.1640  | 6.5370  | M9   |         |         |         |
| H11A   | 14.2841 | -1.1801 | 3.5874  | C20  | 4.2217  | 12.7097 | 15.0619 |
| H11B   | 7.8541  | 3.5268  | 7.0101  | H20A | 4.9731  | 12.5174 | 15.8414 |
| H11C   | 9.4551  | 4.0146  | 6.4207  | H20B | 3.2408  | 12.8096 | 15.5319 |
| C12    | 5.5835  | 0.7379  | 3.5512  | H20C | 4.4730  | 13.6532 | 14.5555 |
| H12A   | 5.2607  | 0.7735  | 2.5041  | O1   | 4.1256  | 11.6412 | 14.1556 |

|        |         |         |         |     |         |         |         |
|--------|---------|---------|---------|-----|---------|---------|---------|
| C1     | 3.5310  | 9.0633  | 9.9821  | H46 | 5.8397  | -4.1138 | 4.2567  |
| C2     | 2.7484  | 11.1501 | 10.7828 | H47 | 5.6773  | -2.5432 | 5.0792  |
| H2A    | 3.5864  | 11.8512 | 10.9409 | C71 | 4.5909  | -2.0531 | 2.8085  |
| H2B    | 1.9198  | 11.4571 | 11.4316 | H72 | 4.5071  | -1.1475 | 2.1970  |
| C3     | 2.3747  | 11.0322 | 9.3157  | H73 | 4.1356  | -1.7752 | 3.7789  |
| H3A    | 1.2959  | 10.8708 | 9.1645  | C74 | 3.7813  | -3.1528 | 2.1736  |
| H3B    | 2.6748  | 11.8970 | 8.7136  | C75 | 2.4060  | -2.9423 | 1.9724  |
| C4     | 3.2628  | 9.4300  | 7.5756  | C35 | 1.6207  | -3.9093 | 1.3517  |
| C5     | 2.4884  | 8.3837  | 7.0588  | H36 | 0.5610  | -3.7407 | 1.1843  |
| C6     | 2.6432  | 8.0446  | 5.7171  | C37 | 2.2061  | -5.1013 | 0.9285  |
| H6     | 2.0434  | 7.2310  | 5.3059  | H38 | 1.5869  | -5.8560 | 0.4469  |
| C7     | 3.5408  | 8.7156  | 4.8877  | C39 | 3.5610  | -5.3245 | 1.1178  |
| C8     | 4.3001  | 9.7475  | 5.4327  | H40 | 4.0181  | -6.2539 | 0.7840  |
| H8     | 5.0168  | 10.2750 | 4.8009  | C41 | 4.3393  | -4.3450 | 1.7343  |
| C9     | 4.1820  | 10.1159 | 6.7717  | H42 | 5.4118  | -4.4853 | 1.8632  |
| C10    | 1.5312  | 7.6411  | 7.9396  | N43 | 5.9876  | -2.4206 | 2.9870  |
| H10A   | 2.0612  | 7.1769  | 8.7796  | C46 | 7.6992  | -2.9795 | 4.4616  |
| H10B   | 1.0025  | 6.8633  | 7.3796  | H45 | 7.9902  | -2.9758 | 5.5198  |
| H10C   | 0.7820  | 8.3133  | 8.3780  | H48 | 8.2251  | -3.8165 | 3.9703  |
| C11    | 3.7124  | 8.3102  | 3.4535  | C47 | 9.4109  | -1.5959 | 3.4790  |
| H11A   | 4.4962  | 7.5489  | 3.3460  | C48 | 10.2707 | -1.1382 | 4.4945  |
| H11B   | 4.0011  | 9.1612  | 2.8265  | C49 | 11.6359 | -1.0450 | 4.2381  |
| H11C   | 2.7903  | 7.8841  | 3.0431  | H50 | 12.2934 | -0.6701 | 5.0250  |
| C12    | 5.0390  | 11.2089 | 7.3381  | C51 | 12.1784 | -1.4032 | 3.0063  |
| H12A   | 5.9385  | 11.3526 | 6.7307  | C52 | 11.3161 | -1.9033 | 2.0366  |
| H12B   | 5.3461  | 10.9818 | 8.3667  | H53 | 11.7249 | -2.2273 | 1.0775  |
| H12C   | 4.5128  | 12.1735 | 7.3647  | C54 | 9.9418  | -2.0222 | 2.2481  |
| C13    | 3.7867  | 9.5039  | 12.3721 | C55 | 9.7439  | -0.7701 | 5.8483  |
| H13A   | 3.9549  | 8.4224  | 12.4119 | H56 | 10.4419 | -0.1058 | 6.3705  |
| H13B   | 3.0838  | 9.7731  | 13.1681 | H57 | 9.6079  | -1.6600 | 6.4793  |
| C14    | 5.0956  | 10.2378 | 12.5449 | H58 | 8.7714  | -0.2709 | 5.7755  |
| C15    | 6.1799  | 9.8877  | 11.7472 | C59 | 13.6403 | -1.2246 | 2.7265  |
| H15    | 6.0395  | 9.0777  | 11.0299 | H60 | 9.7092  | 2.5727  | 7.7351  |
| C16    | 7.3952  | 10.5579 | 11.8392 | H61 | 13.8551 | -0.1980 | 2.4002  |
| H16    | 8.2324  | 10.2658 | 11.2104 | H62 | 13.9846 | -1.8955 | 1.9315  |
| C17    | 7.5246  | 11.6033 | 12.7434 | C63 | 9.1056  | -2.6157 | 1.1541  |
| H17    | 8.4678  | 12.1383 | 12.8315 | H64 | 8.2812  | -3.2309 | 1.5329  |
| C18    | 6.4511  | 11.9877 | 13.5411 | H65 | 9.7267  | -3.2400 | 0.5017  |
| H18    | 6.5689  | 12.8168 | 14.2325 | H66 | 8.6480  | -1.8322 | 0.5356  |
| C19    | 5.2348  | 11.3112 | 13.4367 | N67 | 8.0246  | -1.7119 | 3.8060  |
| N1     | 3.1870  | 9.7773  | 11.0794 | C68 | 6.7137  | 0.8935  | 0.0852  |
| N2     | 3.1226  | 9.8157  | 8.9369  | H69 | 5.9470  | 1.4206  | -0.4964 |
| 94     |         |         |         | H70 | 7.4549  | 0.4834  | -0.6282 |
| D9 dim |         |         |         | C72 | 5.8267  | -1.3511 | 0.0747  |
| C1     | 6.9803  | -0.3466 | 2.0302  | H74 | 5.9191  | -2.2644 | 0.6731  |
| C3     | 7.3967  | 1.7642  | 1.1075  | H75 | 6.5771  | -1.4706 | -0.7308 |
| H3A    | 8.2522  | 2.3122  | 0.6912  | C76 | 4.4495  | -1.3054 | -0.5312 |
| H3B    | 6.6991  | 2.5053  | 1.5359  | C77 | 4.0424  | -2.3804 | -1.3410 |
| C4     | 8.1263  | 1.4101  | 3.3803  | C78 | 2.7632  | -2.4157 | -1.8877 |
| C5     | 9.4341  | 1.9011  | 3.5439  | H77 | 2.4439  | -3.2539 | -2.5002 |
| C6     | 9.7751  | 2.5374  | 4.7341  | C79 | 1.8785  | -1.3693 | -1.6321 |
| H6     | 10.7978 | 2.8968  | 4.8640  | H79 | 0.8802  | -1.4000 | -2.0648 |
| C7     | 8.8533  | 2.7099  | 5.7645  | C80 | 2.2638  | -0.3018 | -0.8361 |
| C8     | 7.5524  | 2.2637  | 5.5571  | H81 | 1.5710  | 0.5125  | -0.6340 |
| H8     | 6.8043  | 2.4238  | 6.3361  | C82 | 3.5458  | -0.2813 | -0.2871 |
| C9     | 7.1608  | 1.6262  | 4.3791  | H83 | 3.8567  | 0.5296  | 0.3700  |
| C10    | 10.4532 | 1.7577  | 2.4540  | N84 | 6.1322  | -0.1811 | 0.8862  |
| H10A   | 11.4669 | 1.8903  | 2.8488  | C85 | 0.6022  | -1.4190 | 2.1215  |
| H10B   | 10.3085 | 2.5111  | 1.6661  | H86 | 0.4374  | -0.4095 | 2.5055  |
| H10C   | 10.3886 | 0.7733  | 1.9763  | H87 | 0.4198  | -1.4262 | 1.0363  |
| C11    | 9.2626  | 3.3245  | 7.0694  | H88 | -0.1031 | -2.1064 | 2.6115  |
| H11A   | 14.2491 | -1.4123 | 3.6184  | C89 | 4.5885  | -4.5153 | -2.2035 |
| H11B   | 8.4062  | 3.7570  | 7.5986  | H90 | 5.4510  | -5.1859 | -2.1907 |
| H11C   | 10.0101 | 4.1138  | 6.9288  | H91 | 3.7418  | -5.0079 | -1.7019 |
| C12    | 5.7244  | 1.2186  | 4.2359  | H92 | 4.3169  | -4.3041 | -3.2483 |
| H12A   | 5.3536  | 1.3141  | 3.2088  | O93 | 4.9762  | -3.3509 | -1.5192 |
| H12B   | 5.0916  | 1.8327  | 4.8868  | O94 | 1.9372  | -1.7459 | 2.4135  |
| H12C   | 5.5798  | 0.1673  | 4.5183  | 49  |         |         |         |
| N2     | 7.8172  | 0.7993  | 2.1249  | M10 |         |         |         |
| C44    | 6.9956  | -1.4084 | 2.8712  | N1  | 11.7899 | 8.4422  | 5.7197  |
| C45    | 6.2093  | -3.0813 | 4.2702  | N2  | 11.4888 | 7.8293  | 3.5795  |

|      |         |         |         |     |         |         |         |
|------|---------|---------|---------|-----|---------|---------|---------|
| B3   | 11.5485 | 7.2124  | 4.9280  | H23 | 15.4000 | 6.6198  | 11.7518 |
| C4   | 12.0002 | 9.6619  | 4.9375  | H24 | 15.5788 | 8.1897  | 10.9610 |
| H5   | 13.0728 | 9.9212  | 4.8231  | H25 | 16.8160 | 6.9475  | 10.7296 |
| H6   | 11.5063 | 10.5399 | 5.3863  | C26 | 11.4593 | 5.4715  | 8.7954  |
| C7   | 11.4100 | 9.2933  | 3.5838  | H27 | 11.1314 | 5.7405  | 9.8083  |
| H8   | 10.3573 | 9.6322  | 3.5044  | H28 | 11.2013 | 4.4160  | 8.6271  |
| H9   | 11.9567 | 9.7665  | 2.7528  | H29 | 10.8671 | 6.0582  | 8.0795  |
| C10  | 12.0622 | 8.4338  | 7.0965  | C30 | 12.4809 | 4.7427  | 2.5439  |
| C11  | 11.0054 | 8.2230  | 8.0085  | C31 | 13.6400 | 5.2078  | 1.8531  |
| C12  | 11.2604 | 8.2488  | 9.3751  | C32 | 13.7079 | 5.0926  | 0.4666  |
| H13  | 10.4322 | 8.0846  | 10.0697 | H33 | 14.6002 | 5.4758  | -0.0405 |
| C14  | 12.5400 | 8.4810  | 9.8829  | C34 | 12.6955 | 4.5202  | -0.2936 |
| C15  | 13.5790 | 8.6499  | 8.9741  | C35 | 11.5778 | 4.0260  | 0.3932  |
| H16  | 14.5983 | 8.7839  | 9.3467  | H36 | 10.7495 | 3.5882  | -0.1741 |
| C17  | 13.3646 | 8.6186  | 7.5948  | C37 | 11.4578 | 4.1348  | 1.7743  |
| C18  | 9.6393  | 7.9338  | 7.4753  | C38 | 14.7862 | 5.7934  | 2.5932  |
| H19  | 8.9305  | 7.7067  | 8.2817  | H39 | 15.5975 | 6.0739  | 1.9062  |
| H20  | 9.7134  | 7.0901  | 6.7675  | H40 | 15.1943 | 5.0926  | 3.3383  |
| H21  | 9.2523  | 8.7778  | 6.8879  | H41 | 14.4637 | 6.6769  | 3.1843  |
| C22  | 12.7799 | 8.5426  | 11.3639 | C42 | 12.7545 | 4.4952  | -1.7910 |
| H23  | 13.8467 | 8.4466  | 11.6002 | H43 | 12.3663 | 3.5508  | -2.2052 |
| H24  | 12.2476 | 7.7423  | 11.8947 | H44 | 13.7843 | 4.6202  | -2.1546 |
| H25  | 12.4360 | 9.4923  | 11.7987 | H45 | 12.1550 | 5.3053  | -2.2385 |
| C26  | 14.5230 | 8.6744  | 6.6468  | C46 | 10.1786 | 3.6892  | 2.4214  |
| H27  | 15.4597 | 8.4143  | 7.1548  | H47 | 9.3487  | 3.7401  | 1.7034  |
| H28  | 14.6582 | 9.6659  | 6.1929  | H48 | 9.9425  | 4.3381  | 3.2752  |
| H29  | 14.3512 | 7.9673  | 5.8223  | H49 | 10.2259 | 2.6565  | 2.8012  |
| C30  | 11.3578 | 7.1345  | 2.3688  | N50 | 12.7564 | 8.8331  | 5.3666  |
| C31  | 10.2110 | 6.3546  | 2.0983  | N51 | 12.0893 | 8.3062  | 3.1592  |
| C32  | 10.1086 | 5.6866  | 0.8826  | B52 | 12.4217 | 7.6537  | 4.4836  |
| H33  | 9.2153  | 5.0874  | 0.6862  | C53 | 13.1862 | 9.9002  | 4.4822  |
| C34  | 11.1015 | 5.7666  | -0.0956 | H54 | 14.2395 | 9.7693  | 4.1512  |
| C35  | 12.2266 | 6.5339  | 0.1830  | H55 | 13.0945 | 10.8916 | 4.9516  |
| H36  | 13.0297 | 6.5947  | -0.5564 | C56 | 12.2759 | 9.7447  | 3.2747  |
| C37  | 12.3736 | 7.2093  | 1.3954  | H57 | 11.3058 | 10.2562 | 3.4553  |
| C38  | 9.1324  | 6.2535  | 3.1284  | H58 | 12.7165 | 10.2019 | 2.3727  |
| H39  | 8.3440  | 5.5553  | 2.8195  | C59 | 12.6652 | 9.0475  | 6.7393  |
| H40  | 8.6759  | 7.2350  | 3.3213  | C60 | 11.4579 | 8.7681  | 7.4456  |
| H41  | 9.5906  | 5.9520  | 4.0882  | C61 | 11.3994 | 8.9585  | 8.8216  |
| C42  | 10.9677 | 5.0172  | -1.3897 | H62 | 10.4633 | 8.7186  | 9.3378  |
| H43  | 11.6910 | 5.3713  | -2.1344 | C63 | 12.4799 | 9.4307  | 9.5623  |
| H44  | 9.9639  | 5.1269  | -1.8214 | C64 | 13.6504 | 9.7366  | 8.8595  |
| H45  | 11.1380 | 3.9393  | -1.2591 | H65 | 14.5295 | 10.0832 | 9.4127  |
| C46  | 13.6380 | 7.9587  | 1.6881  | C66 | 13.7627 | 9.5467  | 7.4873  |
| H47  | 14.4686 | 7.5864  | 1.0759  | C67 | 10.2591 | 8.2900  | 6.7093  |
| H48  | 13.8927 | 7.8532  | 2.7511  | H68 | 9.3971  | 8.1733  | 7.3814  |
| H49  | 13.5478 | 9.0374  | 1.4932  | H69 | 10.4757 | 7.3327  | 6.1937  |
| 98   |         |         |         | H70 | 9.9831  | 8.9828  | 5.8983  |
| D10A |         |         |         | C71 | 12.4319 | 9.5153  | 11.0574 |
| N1   | 12.7732 | 5.4279  | 6.1924  | H72 | 13.0053 | 10.3736 | 11.4408 |
| N2   | 12.3328 | 4.8814  | 3.9326  | H73 | 12.8561 | 8.6144  | 11.5327 |
| B3   | 12.5552 | 6.0699  | 4.8397  | H74 | 11.3998 | 9.6130  | 11.4220 |
| C4   | 12.1097 | 4.1376  | 6.1427  | C75 | 15.0995 | 9.7472  | 6.8364  |
| H5   | 11.0116 | 4.2273  | 6.2916  | H76 | 15.8783 | 9.8957  | 7.5962  |
| H6   | 12.5028 | 3.4395  | 6.8973  | H77 | 15.1342 | 10.6030 | 6.1472  |
| C7   | 12.3700 | 3.6608  | 4.7228  | H78 | 15.3642 | 8.8584  | 6.2473  |
| H8   | 13.3674 | 3.1751  | 4.6565  | C79 | 11.3181 | 7.8619  | 2.0732  |
| H9   | 11.6268 | 2.9108  | 4.4049  | C80 | 10.0252 | 7.2824  | 2.2457  |
| C10  | 13.4978 | 5.7980  | 7.3229  | C81 | 9.3241  | 6.8173  | 1.1361  |
| C11  | 14.8609 | 6.2064  | 7.2189  | H82 | 8.3434  | 6.3573  | 1.3002  |
| C12  | 15.5597 | 6.5918  | 8.3566  | C83 | 9.8165  | 6.9095  | -0.1601 |
| H13  | 16.6004 | 6.9137  | 8.2403  | C84 | 11.0675 | 7.5176  | -0.3295 |
| C14  | 14.9898 | 6.5859  | 9.6282  | H85 | 11.4980 | 7.5880  | -1.3341 |
| C15  | 13.6635 | 6.1531  | 9.7293  | C86 | 11.8128 | 7.9788  | 0.7503  |
| H16  | 13.1736 | 6.1591  | 10.7090 | C87 | 9.4059  | 7.1851  | 3.5920  |
| C17  | 12.9178 | 5.7755  | 8.6180  | H88 | 8.4089  | 6.7248  | 3.5351  |
| C18  | 15.5409 | 6.1925  | 5.8978  | H89 | 9.3007  | 8.1728  | 4.0675  |
| H19  | 16.5943 | 6.4936  | 5.9866  | H90 | 10.0538 | 6.6071  | 4.2846  |
| H20  | 15.0124 | 6.8520  | 5.1817  | C91 | 9.0816  | 6.3160  | -1.3238 |
| H21  | 15.4970 | 5.1937  | 5.4351  | H92 | 9.1743  | 6.9353  | -2.2301 |
| C22  | 15.7315 | 7.1064  | 10.8219 | H93 | 8.0102  | 6.1996  | -1.1072 |

H94 9.4668 5.3169 -1.5850  
C95 13.1937 8.5092 0.4944  
H96 13.6089 8.0667 -0.4215  
H97 13.8544 8.2584 1.3346  
H98 13.2188 9.6038 0.3749  
98

D10B

N1 12.6375 5.3182 6.0470  
N2 12.7849 5.0120 3.7684  
B3 12.6168 6.0198 4.7894  
C4 12.6205 3.8707 5.8027  
H5 11.5882 3.4787 5.8688  
H6 13.2272 3.3353 6.5444  
C7 13.1563 3.7375 4.3912  
H8 14.2565 3.6195 4.3816  
H9 12.7322 2.8770 3.8588  
C10 12.7603 5.7183 7.4045  
C11 14.0422 6.0100 7.9052  
C12 14.1904 6.3057 9.2561  
H13 15.1855 6.5384 9.6403  
C14 13.1018 6.3180 10.1262  
C15 11.8464 6.0076 9.6137  
H16 10.9826 6.0040 10.2818  
C17 11.6559 5.6959 8.2673  
C18 15.2343 5.9750 6.9974  
H19 16.1449 6.2704 7.5307  
H20 15.1077 6.6575 6.1465  
H21 15.3939 4.9722 6.5758  
C22 13.2725 6.7003 11.5661  
H23 12.5443 6.1946 12.2101  
H24 13.1308 7.7817 11.7041  
H25 14.2770 6.4579 11.9321  
C26 10.2881 5.3254 7.7773  
H27 9.5115 5.8049 8.3843  
H28 10.1210 4.2411 7.8353  
H29 10.1386 5.6175 6.7324  
C30 13.0040 5.0998 2.3703  
C31 14.1075 5.8040 1.8587  
C32 14.3224 5.8181 0.4809  
H33 15.1794 6.3692 0.0878  
C34 13.4767 5.1565 -0.4042  
C35 12.4019 4.4482 0.1260  
H36 11.7217 3.9248 -0.5500  
C37 12.1537 4.3994 1.4950  
C38 15.0457 6.5479 2.7606  
H39 16.0009 6.7413 2.2609  
H40 15.2473 6.0028 3.6923  
H41 14.6224 7.5226 3.0499  
C42 13.6875 5.2367 -1.8870  
H43 13.4239 4.2963 -2.3846  
H44 14.7285 5.4716 -2.1352  
H45 13.0616 6.0219 -2.3346  
C46 10.9843 3.6072 1.9997  
H47 10.1506 3.6532 1.2891  
H48 10.6284 3.9830 2.9647  
H49 11.2422 2.5466 2.1282  
N50 12.8402 8.8399 5.1498  
N51 11.6397 8.1684 3.3038  
B52 12.3588 7.6746 4.4553  
C53 12.5955 10.0362 4.3353  
H54 13.4947 10.2958 3.7453  
H55 12.3480 10.9014 4.9638  
C56 11.4592 9.6191 3.4248  
H57 10.4728 9.8392 3.8754  
H58 11.4921 10.1230 2.4516  
C59 13.3761 9.0604 6.4447  
C60 12.4915 9.1298 7.5360  
C61 12.9937 9.4437 8.7947  
H62 12.3056 9.4917 9.6408  
C63 14.3489 9.6927 9.0014  
C64 15.2038 9.6343 7.9053

H65 16.2683 9.8333 8.0464  
C66 14.7400 9.3316 6.6252  
C67 11.0238 8.9032 7.3354  
H68 10.4830 8.9548 8.2871  
H69 10.8283 7.9179 6.8921  
H70 10.5891 9.6476 6.6529  
C71 14.8801 9.9712 10.3758  
H72 15.7565 10.6286 10.3469  
H73 15.1897 9.0407 10.8729  
H74 14.1231 10.4413 11.0143  
C75 15.6950 9.3201 5.4695  
H76 16.7179 9.1196 5.8083  
H77 15.7088 10.2872 4.9484  
H78 15.4234 8.5620 4.7268  
C79 10.8178 7.5309 2.3406  
C80 9.6879 6.7930 2.7337  
C81 8.8644 6.2421 1.7525  
H82 7.9888 5.6680 2.0628  
C83 9.1281 6.3982 0.3952  
C84 10.2443 7.1445 0.0285  
H85 10.4765 7.2728 -1.0312  
C86 11.0893 7.7200 0.9730  
C87 9.3607 6.5741 4.1800  
H88 8.3089 6.2967 4.3072  
H89 9.5593 7.4650 4.7906  
H90 9.9693 5.7582 4.6015  
C91 8.2669 5.7440 -0.6435  
H92 8.1796 6.3619 -1.5446  
H93 7.2570 5.5476 -0.2671  
H94 8.6906 4.7794 -0.9565  
C95 12.2725 8.5165 0.5087  
H96 12.6797 8.0985 -0.4197  
H97 13.0714 8.5207 1.2568  
H98 12.0012 9.5612 0.3016  
98

D10C

N1 12.9305 5.4302 6.1921  
N2 12.4048 4.9119 3.9670  
B3 12.5771 6.0387 4.8857  
C4 12.6520 4.0010 6.1078  
H5 11.6101 3.7648 6.4239  
H6 13.3291 3.4263 6.7620  
C7 12.8060 3.6791 4.6326  
H8 13.8604 3.4033 4.3900  
H9 12.1772 2.8256 4.3206  
C10 13.6434 5.9168 7.3150  
C11 14.9133 6.5796 7.1145  
C12 15.5996 7.0562 8.2408  
H13 16.5588 7.5702 8.0812  
C14 15.1261 6.9309 9.5361  
C15 13.9113 6.2091 9.7345  
H16 13.4489 6.1718 10.7272  
C17 13.1736 5.7545 8.6188  
C18 15.5140 6.6644 5.7575  
H19 16.4995 7.1589 5.8013  
H20 14.8752 7.2262 5.0318  
H21 15.6522 5.6769 5.2753  
C22 15.8986 7.4538 10.7024  
H23 15.2877 8.1031 11.3536  
H24 16.7581 8.0580 10.3700  
H25 16.2884 6.6466 11.3778  
C26 11.8184 5.1640 8.8832  
H27 11.3511 5.7144 9.7182  
H28 11.8541 4.0955 9.1671  
H29 11.1697 5.2599 8.0057  
C30 12.1807 4.8520 2.5530  
C31 13.2920 4.9174 1.6312  
C32 13.0986 4.6049 0.3012  
H33 13.9468 4.7322 -0.3891  
C34 11.8535 4.1842 -0.2295  
C35 10.7975 3.9950 0.7226



|     |         |         |         |      |         |         |         |
|-----|---------|---------|---------|------|---------|---------|---------|
| H36 | 9.8019  | 3.6969  | 0.3632  | C7   | 11.0754 | 8.2251  | 7.9733  |
| C37 | 10.9552 | 4.3176  | 2.0553  | C8   | 11.3275 | 8.2453  | 9.3453  |
| C38 | 14.6387 | 5.3137  | 2.1402  | H9   | 10.5027 | 8.0523  | 10.0363 |
| H39 | 15.3426 | 5.4836  | 1.3089  | C10  | 12.6036 | 8.4688  | 9.8531  |
| H40 | 15.0882 | 4.5572  | 2.8155  | C11  | 13.6451 | 8.6519  | 8.9434  |
| H41 | 14.5898 | 6.2367  | 2.7445  | H12  | 14.6605 | 8.8028  | 9.3187  |
| C42 | 11.7011 | 3.7456  | -1.6369 | C13  | 13.4349 | 8.6533  | 7.5677  |
| H43 | 11.7254 | 2.6311  | -1.8336 | C14  | 9.7207  | 7.8488  | 7.4539  |
| H44 | 12.5013 | 4.1715  | -2.2704 | H15  | 9.0808  | 7.4725  | 8.2617  |
| H45 | 10.7291 | 4.0705  | -2.0820 | H16  | 9.8299  | 7.0681  | 6.6871  |
| C46 | 9.8161  | 4.1098  | 3.0109  | H17  | 9.2014  | 8.6799  | 6.9608  |
| H47 | 8.8663  | 3.9856  | 2.4673  | C18  | 12.8559 | 8.5166  | 11.3322 |
| H48 | 9.7181  | 4.9641  | 3.6955  | H19  | 13.8252 | 8.0712  | 11.5905 |
| H49 | 9.9602  | 3.2269  | 3.6637  | H20  | 12.0805 | 7.9763  | 11.8893 |
| N50 | 12.6504 | 8.8173  | 5.4829  | H21  | 12.8682 | 9.5472  | 11.7155 |
| N51 | 11.9988 | 8.3195  | 3.2912  | C22  | 14.5696 | 8.8308  | 6.6105  |
| B52 | 12.4075 | 7.6909  | 4.5488  | H23  | 15.5348 | 8.8450  | 7.1324  |
| C53 | 12.7244 | 10.0409 | 4.6931  | H24  | 14.4646 | 9.7636  | 6.0405  |
| H54 | 13.7638 | 10.2466 | 4.3496  | H25  | 14.5290 | 8.0184  | 5.8634  |
| H55 | 12.3950 | 10.9126 | 5.2822  | C26  | 11.4158 | 7.1842  | 2.3478  |
| C56 | 11.8560 | 9.7549  | 3.4830  | C27  | 10.1649 | 6.6441  | 1.9989  |
| H57 | 10.7933 | 10.0418 | 3.6711  | C28  | 10.0214 | 5.9731  | 0.7836  |
| H58 | 12.1824 | 10.3171 | 2.5908  | H29  | 9.0450  | 5.5551  | 0.5249  |
| C59 | 12.5749 | 8.9220  | 6.8919  | C30  | 11.0911 | 5.7945  | -0.0866 |
| C60 | 11.4276 | 8.3733  | 7.5831  | C31  | 12.3344 | 6.2993  | 0.2962  |
| C61 | 11.3802 | 8.4862  | 8.9800  | H32  | 13.1939 | 6.1577  | -0.3643 |
| H62 | 10.5150 | 8.0553  | 9.5039  | C33  | 12.5184 | 6.9876  | 1.4909  |
| C63 | 12.3691 | 9.0952  | 9.7329  | C34  | 9.0242  | 6.7037  | 2.9703  |
| C64 | 13.4581 | 9.7032  | 9.0401  | H35  | 8.2166  | 6.0259  | 2.6669  |
| H65 | 14.3092 | 10.1064 | 9.5994  | H36  | 8.6031  | 7.7106  | 3.0842  |
| C66 | 13.5628 | 9.5637  | 7.6386  | H37  | 9.3809  | 6.4133  | 3.9691  |
| C67 | 10.2864 | 7.8020  | 6.8230  | C38  | 10.9321 | 5.0433  | -1.3768 |
| H68 | 9.4902  | 7.4714  | 7.5120  | H39  | 11.4519 | 5.5438  | -2.2046 |
| H69 | 10.5796 | 6.9311  | 6.1855  | H40  | 9.8762  | 4.9457  | -1.6567 |
| H70 | 9.8345  | 8.5150  | 6.1051  | H41  | 11.3462 | 4.0272  | -1.3134 |
| C71 | 12.2695 | 9.1929  | 11.2200 | C42  | 13.8636 | 7.5075  | 1.8855  |
| H72 | 12.1659 | 10.2477 | 11.5883 | H43  | 14.6418 | 7.1738  | 1.1875  |
| H73 | 13.1663 | 8.7988  | 11.7299 | H44  | 14.0793 | 7.1760  | 2.9169  |
| H74 | 11.4096 | 8.6176  | 11.6002 | H45  | 13.8694 | 8.6052  | 1.9200  |
| C75 | 14.8220 | 10.0602 | 6.9874  | H46  | 10.2185 | 9.5578  | 3.0611  |
| H76 | 15.6704 | 9.8637  | 7.6656  | H47  | 10.6028 | 10.2484 | 5.6486  |
| H77 | 14.8079 | 11.1460 | 6.7765  | 94   |         |         |         |
| H78 | 15.0111 | 9.5349  | 6.0448  | D11A |         |         |         |
| C79 | 11.5496 | 7.7959  | 2.0373  | N1   | 12.8371 | 5.3222  | 6.0605  |
| C80 | 10.1931 | 7.4917  | 1.8220  | N2   | 12.7911 | 4.9340  | 3.7969  |
| C81 | 9.7143  | 7.1583  | 0.5595  | B3   | 12.6560 | 6.0332  | 4.7911  |
| H82 | 8.6809  | 6.8062  | 0.4499  | C4   | 12.9933 | 3.9646  | 5.8219  |
| C83 | 10.5864 | 7.1813  | -0.5874 | C5   | 12.9584 | 3.7261  | 4.4928  |
| C84 | 11.8984 | 7.6107  | -0.3764 | C6   | 12.9446 | 5.7947  | 7.3948  |
| H85 | 12.5762 | 7.6508  | -1.2442 | C7   | 14.2175 | 5.9434  | 7.9519  |
| C86 | 12.4133 | 7.9294  | 0.8725  | C8   | 14.3276 | 6.2500  | 9.3312  |
| C87 | 9.2382  | 7.5339  | 2.9826  | H9   | 15.3200 | 6.3511  | 9.7785  |
| H88 | 8.3278  | 6.9539  | 2.7640  | C10  | 13.1927 | 6.4420  | 10.1098 |
| H89 | 8.9302  | 8.5642  | 3.2333  | C11  | 11.9335 | 6.3083  | 9.5283  |
| H90 | 9.7043  | 7.1226  | 3.8901  | H12  | 11.0381 | 6.4341  | 10.1440 |
| C91 | 10.0660 | 6.7946  | -1.9172 | C13  | 11.7846 | 5.9829  | 8.1615  |
| H92 | 10.8636 | 6.7945  | -2.6798 | C14  | 15.4680 | 5.7458  | 7.1586  |
| H93 | 9.2399  | 7.4500  | -2.3072 | H15  | 16.1600 | 6.5886  | 7.3330  |
| H94 | 9.6186  | 5.7663  | -1.9230 | H16  | 15.2620 | 5.6819  | 6.0838  |
| C95 | 13.7986 | 8.4646  | 1.0207  | H17  | 16.0086 | 4.8298  | 7.4554  |
| H96 | 14.3921 | 8.2614  | 0.1127  | C18  | 13.3063 | 6.8380  | 11.5537 |
| H97 | 14.3307 | 8.0214  | 1.8799  | H19  | 13.1359 | 7.9194  | 11.6735 |
| H98 | 13.8529 | 9.5656  | 1.2028  | H20  | 14.3016 | 6.6122  | 11.9611 |
| 47  |         |         |         | H21  | 12.5592 | 6.3250  | 12.1769 |
| M11 |         |         |         | C22  | 10.4114 | 5.7231  | 7.6237  |
| N1  | 11.8911 | 8.4801  | 5.6873  | H23  | 9.8145  | 6.6467  | 7.5370  |
| N2  | 11.5721 | 7.9059  | 3.5446  | H24  | 9.8474  | 5.0557  | 8.2990  |
| B3  | 12.3582 | 7.4184  | 4.7317  | H25  | 10.4472 | 5.2630  | 6.6310  |
| C4  | 10.9893 | 9.3849  | 5.1128  | C26  | 12.9341 | 4.9760  | 2.3951  |
| C5  | 10.7971 | 9.0406  | 3.8224  | C27  | 13.9433 | 5.7951  | 1.8101  |
| C6  | 12.1302 | 8.4600  | 7.0731  | C28  | 14.0090 | 5.8935  | 0.4243  |

|      |         |         |         |     |         |         |         |
|------|---------|---------|---------|-----|---------|---------|---------|
| H29  | 14.7699 | 6.5475  | -0.0146 | C4  | 12.9526 | 4.1790  | 5.9712  |
| C30  | 13.1409 | 5.2042  | -0.4196 | C5  | 11.8718 | 3.9261  | 5.2102  |
| C31  | 12.2018 | 4.3407  | 0.1749  | C6  | 14.5274 | 5.9579  | 6.4381  |
| H32  | 11.4941 | 3.8005  | -0.4602 | C7  | 15.6414 | 6.2971  | 5.6532  |
| C33  | 12.0814 | 4.2277  | 1.5533  | C8  | 16.8227 | 6.6692  | 6.2911  |
| C34  | 14.9303 | 6.5244  | 2.6589  | H9  | 17.6869 | 6.9379  | 5.6806  |
| H35  | 15.7195 | 6.9749  | 2.0413  | C10 | 16.9313 | 6.7098  | 7.6780  |
| H36  | 15.4036 | 5.8624  | 3.4008  | C11 | 15.8203 | 6.3435  | 8.4311  |
| H37  | 14.4464 | 7.3191  | 3.2572  | H12 | 15.8828 | 6.3691  | 9.5213  |
| C38  | 13.2034 | 5.3516  | -1.9091 | C13 | 14.6181 | 5.9609  | 7.8395  |
| H39  | 13.5412 | 4.4323  | -2.4216 | C14 | 15.5838 | 6.2620  | 4.1551  |
| H40  | 13.8916 | 6.1574  | -2.1990 | H15 | 16.5917 | 6.2783  | 3.7268  |
| H41  | 12.2170 | 5.5970  | -2.3329 | H16 | 15.0372 | 7.1277  | 3.7508  |
| C42  | 10.9735 | 3.3908  | 2.1218  | H17 | 15.0655 | 5.3649  | 3.7906  |
| H43  | 10.2653 | 3.1087  | 1.3316  | C18 | 18.1935 | 7.1776  | 8.3392  |
| H44  | 10.4217 | 3.9624  | 2.8812  | H19 | 18.1581 | 8.2578  | 8.5385  |
| H45  | 11.3273 | 2.4735  | 2.6139  | H20 | 19.0713 | 6.9953  | 7.7092  |
| N46  | 12.6506 | 8.8410  | 5.2539  | H21 | 18.3562 | 6.6795  | 9.3016  |
| N47  | 11.6413 | 8.2221  | 3.2850  | C22 | 13.4596 | 5.5700  | 8.7097  |
| B52  | 12.3067 | 7.6413  | 4.4866  | H23 | 12.5025 | 5.8530  | 8.2609  |
| C49  | 12.2925 | 9.9743  | 4.5425  | H24 | 13.5332 | 6.0598  | 9.6878  |
| C50  | 11.7060 | 9.6219  | 3.3792  | H25 | 13.4270 | 4.4868  | 8.8861  |
| C51  | 13.1932 | 9.0055  | 6.5542  | C26 | 10.5520 | 4.9363  | 3.4711  |
| C52  | 12.3195 | 9.2608  | 7.6131  | C27 | 11.0199 | 4.5778  | 2.1976  |
| C53  | 12.8628 | 9.5995  | 8.8763  | C28 | 10.0901 | 4.3310  | 1.1927  |
| H54  | 12.1866 | 9.8197  | 9.7069  | H29 | 10.4470 | 4.0580  | 0.1979  |
| C55  | 14.2384 | 9.6323  | 9.0739  | C30 | 8.7194  | 4.4244  | 1.4265  |
| C56  | 15.0909 | 9.3575  | 8.0073  | C31 | 8.2851  | 4.7590  | 2.7069  |
| H57  | 16.1741 | 9.4115  | 8.1535  | H32 | 7.2143  | 4.8144  | 2.9104  |
| C58  | 14.5861 | 9.0417  | 6.7255  | C33 | 9.1824  | 5.0121  | 3.7444  |
| C59  | 10.8338 | 9.2391  | 7.4549  | C34 | 12.4892 | 4.4305  | 1.9458  |
| H60  | 10.3807 | 8.6296  | 8.2570  | H35 | 12.6903 | 4.2099  | 0.8921  |
| H61  | 10.5323 | 8.8204  | 6.4876  | H36 | 12.9224 | 3.6292  | 2.5600  |
| H62  | 10.3928 | 10.2481 | 7.5422  | H37 | 13.0269 | 5.3509  | 2.2083  |
| C63  | 14.8091 | 9.9128  | 10.4336 | C38 | 7.7395  | 4.1989  | 0.3142  |
| H64  | 15.0910 | 8.9748  | 10.9363 | H39 | 6.7762  | 3.8355  | 0.6888  |
| H65  | 14.0858 | 10.4300 | 11.0794 | H40 | 8.1174  | 3.4722  | -0.4145 |
| H66  | 15.7169 | 10.5300 | 10.3751 | H41 | 7.5444  | 5.1320  | -0.2330 |
| C67  | 15.5428 | 8.9034  | 5.5813  | C42 | 8.6909  | 5.3449  | 5.1210  |
| H68  | 16.1142 | 7.9607  | 5.6206  | H43 | 7.6111  | 5.1833  | 5.2015  |
| H69  | 16.2899 | 9.7163  | 5.6007  | H44 | 8.8907  | 6.3944  | 5.3787  |
| H70  | 15.0265 | 8.9322  | 4.6157  | H45 | 9.1886  | 4.7386  | 5.8877  |
| C71  | 10.8843 | 7.6233  | 2.2598  | N46 | 12.7751 | 8.8840  | 5.2825  |
| C72  | 9.8019  | 6.7566  | 2.5892  | N47 | 12.2431 | 8.4285  | 3.1194  |
| C73  | 9.1121  | 6.1199  | 1.5649  | B52 | 12.4668 | 7.7748  | 4.3959  |
| H74  | 8.2994  | 5.4367  | 1.8339  | C49 | 12.7092 | 10.0802 | 4.5643  |
| C75  | 9.4197  | 6.3105  | 0.2177  | C50 | 12.3941 | 9.8096  | 3.2831  |
| C76  | 10.4379 | 7.2311  | -0.0897 | C51 | 13.0322 | 8.9340  | 6.6795  |
| H77  | 10.7091 | 7.3990  | -1.1362 | C52 | 12.0178 | 8.6031  | 7.5893  |
| C78  | 11.1710 | 7.8742  | 0.8974  | C53 | 12.2794 | 8.7306  | 8.9528  |
| C79  | 9.3864  | 6.5474  | 4.0078  | H54 | 11.4917 | 8.4765  | 9.6647  |
| H80  | 8.4496  | 5.9753  | 4.0590  | C55 | 13.5111 | 9.1682  | 9.4304  |
| H81  | 9.2410  | 7.5016  | 4.5375  | C56 | 14.4959 | 9.4968  | 8.5030  |
| H82  | 10.1627 | 6.0171  | 4.5899  | H57 | 15.4727 | 9.8323  | 8.8576  |
| C83  | 8.6628  | 5.6109  | -0.8694 | C58 | 14.2797 | 9.3936  | 7.1318  |
| H84  | 7.9117  | 6.2542  | -1.3648 | C59 | 10.6763 | 8.1235  | 7.1226  |
| H85  | 8.1268  | 4.7348  | -0.4793 | H60 | 9.9349  | 8.1965  | 7.9252  |
| H86  | 9.3359  | 5.2547  | -1.6637 | H61 | 10.7160 | 7.0708  | 6.8016  |
| C87  | 12.3223 | 8.7477  | 0.4931  | H62 | 10.3161 | 8.7024  | 6.2616  |
| H88  | 12.5659 | 8.5894  | -0.5657 | C63 | 13.7903 | 9.2457  | 10.9019 |
| H89  | 13.2131 | 8.4963  | 1.0856  | H64 | 14.3096 | 8.3439  | 11.2558 |
| H90  | 12.1347 | 9.8200  | 0.6479  | H65 | 12.8669 | 9.3380  | 11.4841 |
| H91  | 11.2511 | 10.2546 | 2.6276  | H66 | 14.4323 | 10.0999 | 11.1463 |
| H92  | 12.4895 | 10.9617 | 4.9454  | C67 | 15.3730 | 9.7601  | 6.1721  |
| H93  | 13.1191 | 3.2702  | 6.6460  | H68 | 15.3973 | 9.0804  | 5.3129  |
| H94  | 13.1024 | 2.7920  | 3.9634  | H69 | 16.3501 | 9.7160  | 6.6668  |
| 94   |         |         |         | H70 | 15.2483 | 10.7745 | 5.7733  |
| D11B |         |         |         | C71 | 11.6858 | 7.9779  | 1.8862  |
| N1   | 13.3326 | 5.5129  | 5.8078  | C72 | 10.2882 | 7.9548  | 1.7597  |
| N2   | 11.5058 | 5.0864  | 4.5198  | C73 | 9.7348  | 7.5875  | 0.5376  |
| B3   | 12.4281 | 6.1515  | 4.8626  | H74 | 8.6483  | 7.5558  | 0.4381  |

|      |         |         |         |
|------|---------|---------|---------|
| C75  | 10.5326 | 7.2559  | -0.5553 |
| C76  | 11.9164 | 7.3196  | -0.4099 |
| H77  | 12.5543 | 7.0873  | -1.2646 |
| C78  | 12.5136 | 7.6850  | 0.7970  |
| C79  | 9.4191  | 8.3424  | 2.9170  |
| H80  | 8.3612  | 8.1682  | 2.6934  |
| H81  | 9.5504  | 9.4008  | 3.1803  |
| H82  | 9.6780  | 7.7628  | 3.8127  |
| C83  | 9.9126  | 6.8069  | -1.8447 |
| H84  | 8.9390  | 7.2823  | -2.0117 |
| H85  | 9.7438  | 5.7207  | -1.8409 |
| H86  | 10.5534 | 7.0319  | -2.7044 |
| C87  | 14.0057 | 7.7687  | 0.9155  |
| H88  | 14.4774 | 7.7492  | -0.0724 |
| H89  | 14.4142 | 6.9272  | 1.4929  |
| H90  | 14.3222 | 8.6830  | 1.4318  |
| H91  | 12.2503 | 10.4849 | 2.4481  |
| H92  | 12.8870 | 11.0339 | 5.0434  |
| H93  | 13.5086 | 3.5125  | 6.6178  |
| H94  | 11.3177 | 3.0043  | 5.0797  |
| 94   |         |         |         |
| D11C |         |         |         |
| N1   | 12.9749 | 5.3936  | 6.0633  |
| N2   | 12.7481 | 4.9663  | 3.8148  |
| B3   | 12.6720 | 6.0592  | 4.7997  |
| C4   | 13.1916 | 4.0454  | 5.8195  |
| C5   | 13.0639 | 3.7901  | 4.4970  |
| C6   | 13.1247 | 5.8496  | 7.4171  |
| C7   | 14.4223 | 6.0007  | 7.9205  |
| C8   | 14.5824 | 6.2656  | 9.3299  |
| H9   | 15.5853 | 6.4407  | 9.7355  |
| C10  | 13.4659 | 6.4046  | 10.1445 |
| C11  | 12.1814 | 6.2712  | 9.6239  |
| H12  | 11.3069 | 6.4092  | 10.2713 |
| C13  | 11.9865 | 6.0064  | 8.2199  |
| C14  | 15.6527 | 5.8519  | 7.1006  |
| H15  | 16.3263 | 6.7270  | 7.2496  |
| H16  | 15.4332 | 5.7784  | 6.0278  |
| H17  | 16.2666 | 4.9646  | 7.3884  |
| C18  | 13.6310 | 6.7632  | 11.5955 |
| H19  | 13.3060 | 7.8056  | 11.7611 |
| H20  | 14.6759 | 6.6646  | 11.9305 |
| H21  | 13.0019 | 6.1279  | 12.2463 |
| C22  | 10.6095 | 5.6817  | 7.7517  |
| H23  | 9.8947  | 6.4998  | 7.9831  |
| H24  | 10.1894 | 4.7826  | 8.2624  |
| H25  | 10.5700 | 5.5046  | 6.6696  |
| C26  | 12.7123 | 4.9323  | 2.3830  |
| C27  | 13.6931 | 5.6918  | 1.6607  |
| C28  | 13.6775 | 5.5965  | 0.2519  |
| H29  | 14.4298 | 6.1612  | -0.3165 |
| C30  | 12.7542 | 4.8389  | -0.4401 |
| C31  | 11.8331 | 4.0226  | 0.2847  |
| H32  | 10.9368 | 3.6387  | -0.2222 |
| C33  | 11.7954 | 4.1394  | 1.7096  |
| C34  | 14.7721 | 6.4361  | 2.3734  |
| H35  | 15.4613 | 6.8973  | 1.6456  |
| H36  | 15.3812 | 5.8009  | 3.0487  |
| H37  | 14.3929 | 7.2483  | 3.0271  |
| C38  | 12.7841 | 4.7754  | -1.9336 |
| H39  | 13.0711 | 3.7623  | -2.3159 |
| H40  | 13.4814 | 5.5179  | -2.3543 |
| H41  | 11.7922 | 4.9783  | -2.3719 |
| C42  | 10.6846 | 3.4217  | 2.4111  |
| H43  | 9.7328  | 3.6978  | 1.9173  |
| H44  | 10.6191 | 3.6708  | 3.4760  |
| H45  | 10.7771 | 2.3209  | 2.3130  |
| N46  | 12.5181 | 8.8373  | 5.3588  |
| N47  | 11.6663 | 8.2463  | 3.3065  |
| B52  | 12.2893 | 7.6716  | 4.5113  |
| C49  | 12.0752 | 9.9711  | 4.6933  |
| C50  | 11.5688 | 9.6277  | 3.4861  |
| C51  | 13.0420 | 9.0101  | 6.6847  |
| C52  | 12.1342 | 9.2308  | 7.7260  |
| C53  | 12.6537 | 9.6062  | 9.0187  |
| H54  | 11.9648 | 9.7301  | 9.8613  |
| C55  | 14.0262 | 9.6992  | 9.2174  |
| C56  | 14.9167 | 9.4515  | 8.1769  |
| H57  | 15.9979 | 9.5070  | 8.3528  |
| C58  | 14.4317 | 9.0716  | 6.8725  |
| C59  | 10.6583 | 9.1459  | 7.5721  |
| H60  | 10.2248 | 8.4892  | 8.3614  |
| H61  | 10.3620 | 8.7375  | 6.5974  |
| H62  | 10.1473 | 10.1297 | 7.7045  |
| C63  | 14.5672 | 10.0113 | 10.5853 |
| H64  | 15.0158 | 9.1044  | 11.0261 |
| H65  | 13.7830 | 10.3801 | 11.2656 |
| H66  | 15.3676 | 10.7728 | 10.5420 |
| C67  | 15.4072 | 9.0241  | 5.7473  |
| H68  | 16.2327 | 8.3093  | 5.9501  |
| H69  | 15.9130 | 10.0055 | 5.5823  |
| H70  | 14.9359 | 8.7246  | 4.8027  |
| C71  | 11.0597 | 7.6646  | 2.1472  |
| C72  | 9.9463  | 6.7761  | 2.3337  |
| C73  | 9.3186  | 6.2707  | 1.1745  |
| H74  | 8.4488  | 5.6106  | 1.3001  |
| C75  | 9.7526  | 6.5593  | -0.1044 |
| C76  | 10.8199 | 7.4912  | -0.2828 |
| H77  | 11.3364 | 7.5501  | -1.2506 |
| C78  | 11.4931 | 7.9943  | 0.8719  |
| C79  | 9.3781  | 6.5250  | 3.6905  |
| H80  | 8.4933  | 5.8700  | 3.6173  |
| H81  | 9.0632  | 7.4480  | 4.2194  |
| H82  | 10.0914 | 6.0381  | 4.3865  |
| C83  | 9.0320  | 6.0159  | -1.2964 |
| H84  | 8.4889  | 6.8096  | -1.8720 |
| H85  | 8.3075  | 5.2376  | -1.0074 |
| H86  | 9.7246  | 5.5588  | -2.0228 |
| C87  | 12.7134 | 8.8273  | 0.6288  |
| H88  | 13.3700 | 8.2765  | -0.0720 |
| H89  | 13.2727 | 9.0434  | 1.5458  |
| H90  | 12.4669 | 9.7886  | 0.1343  |
| H91  | 11.1175 | 10.2491 | 2.7192  |
| H92  | 12.1567 | 10.9466 | 5.1638  |
| H93  | 13.4338 | 3.3761  | 6.6391  |
| H94  | 13.1864 | 2.8591  | 3.9538  |
| 17   |         |         |         |
| M12  |         |         |         |
| N1   | 11.6931 | 8.4265  | 5.7343  |
| N2   | 11.6413 | 7.8171  | 3.5578  |
| B3   | 11.6371 | 7.1682  | 4.9141  |
| C4   | 11.9170 | 9.6404  | 4.9812  |
| H5   | 12.9884 | 9.9523  | 5.0077  |
| H6   | 11.3452 | 10.5117 | 5.3649  |
| C7   | 11.4990 | 9.2562  | 3.5668  |
| H8   | 10.4466 | 9.5689  | 3.3657  |
| H9   | 12.1128 | 9.7669  | 2.7950  |
| C10  | 11.2806 | 7.1699  | 2.3461  |
| H11  | 11.3350 | 6.0863  | 2.5162  |
| H12  | 10.2459 | 7.4084  | 2.0047  |
| H13  | 11.9436 | 7.4323  | 1.4923  |
| C14  | 12.0314 | 8.4842  | 7.1125  |
| H15  | 11.9109 | 7.4751  | 7.5287  |
| H16  | 13.0828 | 8.8057  | 7.3000  |
| H17  | 11.3966 | 9.1897  | 7.6928  |
| 34   |         |         |         |
| D12A |         |         |         |
| N1   | 12.6111 | 5.4193  | 6.2586  |
| N2   | 12.3769 | 4.8588  | 3.8956  |
| B3   | 12.4917 | 6.0901  | 4.8519  |
| C4   | 12.2194 | 4.0544  | 6.0627  |
| H5   | 11.0986 | 3.9393  | 6.0398  |

|      |         |         |        |      |         |         |        |
|------|---------|---------|--------|------|---------|---------|--------|
| H6   | 12.5900 | 3.3616  | 6.8534 | H7   | 13.6324 | 10.5529 | 5.4811 |
| C7   | 12.7603 | 3.7253  | 4.6844 | H8   | 13.4147 | 10.1577 | 7.2871 |
| H8   | 13.8803 | 3.6249  | 4.7578 | C9   | 11.6370 | 9.8585  | 5.9549 |
| H9   | 12.3840 | 2.7530  | 4.2896 | H10  | 11.0294 | 10.2550 | 6.8416 |
| N10  | 12.9372 | 8.8529  | 5.3519 | H11  | 11.4666 | 10.5539 | 5.0426 |
| N11  | 12.0306 | 8.3174  | 3.1510 | C12  | 14.9457 | 8.4949  | 5.5646 |
| B12  | 12.4863 | 7.6351  | 4.4816 | C32  | 9.9478  | 8.4362  | 5.1330 |
| C13  | 13.0474 | 9.9529  | 4.4395 | N52  | 13.7411 | 5.2657  | 4.3695 |
| H14  | 14.0204 | 9.9304  | 3.8713 | N53  | 12.2471 | 6.0211  | 2.7258 |
| H15  | 12.9940 | 10.9524 | 4.9302 | B52  | 12.6461 | 6.3849  | 4.1701 |
| C16  | 11.9163 | 9.7128  | 3.4580 | C55  | 13.2768 | 4.1048  | 3.6463 |
| H17  | 10.9432 | 9.9502  | 3.9746 | H56  | 12.7117 | 3.3874  | 4.3502 |
| H18  | 11.9663 | 10.3764 | 2.5638 | H57  | 14.1471 | 3.5255  | 3.1730 |
| C19  | 14.1474 | 8.6648  | 6.0851 | C58  | 12.2587 | 4.5952  | 2.6112 |
| H20  | 14.4141 | 9.5633  | 6.6935 | H59  | 12.5107 | 4.2729  | 1.5410 |
| H21  | 14.0564 | 7.8082  | 6.7671 | H60  | 11.2278 | 4.1525  | 2.9034 |
| H22  | 15.0156 | 8.4236  | 5.4134 | C61  | 14.1302 | 4.8712  | 5.6746 |
| C23  | 11.8447 | 6.0341  | 7.2945 | C81  | 11.1762 | 6.5984  | 2.0050 |
| H24  | 11.9743 | 5.5165  | 8.2762 | H24  | 15.3049 | 7.4883  | 5.2908 |
| H25  | 12.1415 | 7.0841  | 7.4227 | H25  | 15.1074 | 9.1762  | 4.6497 |
| H26  | 10.7479 | 6.0593  | 7.0502 | H26  | 15.6161 | 8.8889  | 6.3936 |
| C27  | 13.1485 | 4.9425  | 2.6974 | H27  | 9.2015  | 8.8235  | 5.9067 |
| H28  | 13.0190 | 4.0406  | 2.0506 | H28  | 9.8057  | 9.0590  | 4.1752 |
| H29  | 12.8567 | 5.8253  | 2.1121 | H29  | 9.7118  | 7.3799  | 4.8617 |
| H30  | 14.2452 | 5.0703  | 2.9084 | H31  | 14.4279 | 5.7399  | 6.2863 |
| C31  | 10.8206 | 7.8100  | 2.5884 | H32  | 13.2764 | 4.3363  | 6.2338 |
| H32  | 10.5481 | 8.3317  | 1.6387 | H33  | 15.0088 | 4.1507  | 5.6447 |
| H33  | 10.9164 | 6.7371  | 2.3714 | H34  | 11.2671 | 6.3487  | 0.8937 |
| H34  | 9.9547  | 7.8971  | 3.2999 | H35  | 10.1484 | 6.2210  | 2.3602 |
| 34   |         |         |        | H36  | 11.1764 | 7.7042  | 2.1550 |
| D12B |         |         |        | 15   |         |         |        |
| N1   | 12.4629 | 5.4960  | 5.9313 | M13  |         |         |        |
| N2   | 12.6922 | 5.0421  | 3.6891 | N1   | 11.8204 | 8.3958  | 5.7195 |
| B3   | 12.4861 | 6.0958  | 4.6337 | N2   | 11.4971 | 7.8130  | 3.5796 |
| C4   | 12.4842 | 4.0462  | 5.8134 | B3   | 12.2606 | 7.2947  | 4.7792 |
| H5   | 11.4700 | 3.6342  | 5.9726 | C4   | 10.9772 | 9.3315  | 5.1282 |
| H6   | 13.1374 | 3.5804  | 6.5674 | C5   | 10.7817 | 8.9790  | 3.8340 |
| C7   | 12.9698 | 3.7945  | 4.3842 | H6   | 10.1746 | 9.4870  | 3.0836 |
| H8   | 14.0539 | 3.5757  | 4.3601 | H7   | 10.5645 | 10.1894 | 5.6607 |
| H9   | 12.4631 | 2.9379  | 3.9131 | C8   | 12.2021 | 8.5163  | 7.0881 |
| N10  | 12.9472 | 8.8293  | 4.9386 | H9   | 12.8713 | 7.6730  | 7.3072 |
| N11  | 11.4735 | 8.2958  | 3.2566 | H10  | 12.7421 | 9.4579  | 7.3126 |
| B12  | 12.3030 | 7.7368  | 4.2781 | H11  | 11.3455 | 8.4724  | 7.7903 |
| C13  | 12.6680 | 10.0729 | 4.2373 | C12  | 11.4759 | 7.2084  | 2.2884 |
| H14  | 13.5381 | 10.3688 | 3.6214 | H13  | 12.1201 | 6.3201  | 2.3424 |
| H15  | 12.4748 | 10.9044 | 4.9328 | H14  | 10.4645 | 6.8859  | 1.9691 |
| C16  | 11.4535 | 9.7464  | 3.3654 | H15  | 11.8603 | 7.8702  | 1.4867 |
| H17  | 10.5134 | 10.0818 | 3.8425 | 30   |         |         |        |
| H18  | 11.5004 | 10.2349 | 2.3798 | D13A |         |         |        |
| C19  | 10.4070 | 7.6792  | 2.5219 | N1   | 13.0449 | 5.3781  | 6.0394 |
| H20  | 10.4493 | 7.9300  | 1.4498 | N2   | 13.6864 | 5.0043  | 3.7417 |
| H21  | 10.4699 | 6.5899  | 2.6210 | B3   | 13.0607 | 6.1132  | 4.6428 |
| H22  | 9.4150  | 7.9957  | 2.8893 | C4   | 13.3517 | 4.0424  | 5.7803 |
| C23  | 14.0864 | 8.8120  | 5.8096 | C5   | 13.7008 | 3.8326  | 4.4930 |
| H24  | 13.9473 | 9.4737  | 6.6795 | N6   | 12.1965 | 8.5982  | 5.6134 |
| H25  | 14.2551 | 7.7942  | 6.1778 | N7   | 12.1711 | 8.4720  | 3.1928 |
| H26  | 15.0060 | 9.1427  | 5.2952 | B8   | 12.5352 | 7.6011  | 4.4250 |
| C27  | 11.9955 | 6.0450  | 7.1711 | C9   | 11.6195 | 9.7333  | 5.0078 |
| H28  | 12.6781 | 5.8146  | 8.0047 | C10  | 11.5786 | 9.6283  | 3.6602 |
| H29  | 11.9150 | 7.1343  | 7.0862 | H11  | 11.0987 | 10.3229 | 2.9608 |
| H30  | 11.0014 | 5.6528  | 7.4489 | H12  | 11.2824 | 10.5907 | 5.6008 |
| C31  | 13.0938 | 5.1283  | 2.3147 | H13  | 13.3830 | 3.3029  | 6.5903 |
| H32  | 12.5143 | 4.4437  | 1.6749 | H14  | 14.0939 | 2.9026  | 4.0636 |
| H33  | 12.9427 | 6.1496  | 1.9476 | C15  | 13.2998 | 8.9059  | 6.4802 |
| H34  | 14.1597 | 4.8742  | 2.1786 | H16  | 14.1854 | 9.3324  | 5.9406 |
| 34   |         |         |        | H17  | 13.0116 | 9.6334  | 7.2785 |
| D12C |         |         |        | H18  | 13.6538 | 7.9856  | 6.9675 |
| N3   | 13.5867 | 8.4674  | 5.9686 | C23  | 13.3442 | 4.8948  | 2.3680 |
| N4   | 11.2649 | 8.5132  | 5.6417 | H24  | 13.8306 | 4.0177  | 1.8888 |
| B3   | 12.4956 | 7.8072  | 5.0393 | H25  | 12.2339 | 4.8320  | 2.1949 |
| C6   | 13.1449 | 9.8186  | 6.2245 | H26  | 13.6776 | 5.7965  | 1.8224 |

|      |         |         |        |           |         |         |         |
|------|---------|---------|--------|-----------|---------|---------|---------|
| C27  | 11.8815 | 5.5816  | 6.8525 | H30       | 14.0069 | 9.2121  | 2.5667  |
| H28  | 11.9375 | 5.0055  | 7.8044 | 50        |         |         |         |
| H29  | 11.7729 | 6.6509  | 7.0891 | M16       |         |         |         |
| H30  | 10.9409 | 5.2970  | 6.3196 | N1        | 11.7505 | 8.5487  | 5.6132  |
| H27  | 11.2608 | 8.6935  | 1.3148 | N2        | 11.5820 | 8.0054  | 3.5753  |
| H31  | 12.6412 | 7.5719  | 1.3500 | C3        | 12.0782 | 7.5259  | 4.7476  |
| H32  | 11.1141 | 7.0390  | 2.0767 | C4        | 11.0351 | 9.6728  | 4.9981  |
| C30  | 11.7766 | 7.9375  | 1.9410 | C5        | 10.9203 | 9.2583  | 3.6767  |
| 30   |         |         |        | C6        | 12.0673 | 8.4934  | 6.9884  |
| D13B |         |         |        | C7        | 11.0359 | 8.5186  | 7.9419  |
| N2   | 13.9238 | 5.7005  | 6.1333 | C8        | 11.3672 | 8.4543  | 9.2937  |
| N3   | 13.2658 | 4.8511  | 4.1367 | H9        | 10.5623 | 8.4677  | 10.0328 |
| B3   | 13.1587 | 6.0319  | 4.9570 | C10       | 12.6873 | 8.3576  | 9.7257  |
| C4   | 14.2128 | 6.5038  | 7.2940 | C11       | 13.6902 | 8.3190  | 8.7612  |
| C24  | 12.6728 | 4.5727  | 2.8533 | H12       | 14.7330 | 8.2368  | 9.0767  |
| N44  | 11.3585 | 8.1260  | 5.4495 | C13       | 13.4048 | 8.3913  | 7.3982  |
| N45  | 12.4330 | 8.2946  | 3.4604 | C14       | 9.6050  | 8.5897  | 7.5118  |
| B52  | 12.3347 | 7.4545  | 4.6277 | H15       | 8.9281  | 8.4216  | 8.3581  |
| C47  | 10.8128 | 7.7361  | 6.7248 | H16       | 9.3961  | 7.8419  | 6.7346  |
| C67  | 13.2807 | 8.1569  | 2.3036 | H17       | 9.4120  | 9.5702  | 7.0561  |
| C91  | 11.5701 | 9.3751  | 3.6064 | C18       | 13.0154 | 8.3172  | 11.1903 |
| C92  | 10.9278 | 9.2738  | 4.7933 | H19       | 13.9994 | 7.8671  | 11.3693 |
| C99  | 14.4346 | 4.4148  | 5.9929 | H20       | 12.2734 | 7.7366  | 11.7534 |
| C100 | 14.0409 | 3.9073  | 4.8017 | H21       | 13.0343 | 9.3232  | 11.6328 |
| H93  | 11.4844 | 10.1432 | 2.8467 | C22       | 14.5133 | 8.3527  | 6.3908  |
| H94  | 10.1868 | 9.9350  | 5.2269 | H23       | 14.4252 | 7.4585  | 5.7626  |
| H95  | 15.0493 | 3.9586  | 6.7601 | H24       | 15.4933 | 8.3682  | 6.8835  |
| H96  | 14.2508 | 2.9355  | 4.3704 | H25       | 14.4482 | 9.2074  | 5.7050  |
| H19  | 15.2944 | 6.5849  | 7.4672 | C26       | 11.5191 | 7.1976  | 2.4166  |
| H20  | 13.8182 | 7.5135  | 7.1411 | C27       | 10.3498 | 6.4755  | 2.1541  |
| H21  | 13.7560 | 6.0903  | 8.2047 | C28       | 10.2842 | 5.7057  | 0.9936  |
| H22  | 13.4319 | 4.4545  | 2.0667 | H29       | 9.3759  | 5.1359  | 0.7851  |
| H23  | 12.0703 | 3.6547  | 2.8798 | C30       | 11.3545 | 5.6359  | 0.1044  |
| H24  | 12.0149 | 5.4014  | 2.5730 | C31       | 12.5159 | 6.3472  | 0.4041  |
| H25  | 11.2016 | 6.7495  | 6.9965 | H32       | 13.3686 | 6.2907  | -0.2765 |
| H26  | 11.0833 | 8.4439  | 7.5215 | C33       | 12.6151 | 7.1327  | 1.5505  |
| H27  | 9.7169  | 7.6716  | 6.6898 | C34       | 9.2361  | 6.5070  | 3.1532  |
| H28  | 13.9545 | 7.3067  | 2.4498 | H35       | 8.3907  | 5.8849  | 2.8376  |
| H29  | 12.7000 | 7.9817  | 1.3866 | H36       | 8.8893  | 7.5333  | 3.3323  |
| H30  | 13.8955 | 9.0535  | 2.1465 | H37       | 9.6074  | 6.1505  | 4.1241  |
| 30   |         |         |        | C38       | 11.2596 | 4.8272  | -1.1571 |
| D13C |         |         |        | H39       | 11.0230 | 5.4565  | -2.0265 |
| N2   | 13.9778 | 5.7216  | 6.1638 | H40       | 10.4748 | 4.0648  | -1.0869 |
| N3   | 13.4802 | 4.8763  | 4.0927 | H41       | 12.2051 | 4.3176  | -1.3810 |
| B3   | 13.2313 | 6.0267  | 4.9641 | C42       | 13.8636 | 7.8875  | 1.8877  |
| C4   | 14.3994 | 6.6433  | 7.1393 | H43       | 14.6371 | 7.7451  | 1.1241  |
| C24  | 12.6992 | 4.5059  | 2.9895 | H44       | 14.2494 | 7.5620  | 2.8615  |
| N44  | 11.2880 | 8.0988  | 5.4666 | H45       | 13.6583 | 8.9611  | 1.9896  |
| N45  | 12.2881 | 8.2999  | 3.4201 | O46       | 10.6821 | 10.6937 | 5.6253  |
| B52  | 12.2815 | 7.4698  | 4.6138 | C47       | 10.3871 | 10.0231 | 2.5286  |
| C47  | 10.6662 | 7.5305  | 6.5877 | H48       | 11.1389 | 10.2510 | 1.7506  |
| C67  | 13.2777 | 8.3476  | 2.4300 | H49       | 9.5429  | 9.5391  | 2.0027  |
| C91  | 11.4117 | 9.5712  | 3.5682 | H50       | 10.0224 | 10.9793 | 2.9257  |
| C92  | 10.5305 | 9.2511  | 4.7635 | 100       |         |         |         |
| C99  | 14.9298 | 4.5266  | 5.8965 | D16 dimer |         |         |         |
| C100 | 14.1954 | 3.7317  | 4.7943 | N1        | 12.9962 | 5.5564  | 6.0029  |
| H93  | 12.2299 | 10.3098 | 3.9365 | N2        | 12.0746 | 5.0963  | 3.9808  |
| H94  | 9.6169  | 8.6548  | 4.3661 | C3        | 12.5821 | 6.1765  | 4.7845  |
| H95  | 14.8915 | 3.8935  | 6.8529 | C4        | 12.5491 | 4.1832  | 6.0268  |
| H96  | 13.2554 | 3.1730  | 5.2638 | C5        | 12.0655 | 3.8501  | 4.7780  |
| H19  | 15.5272 | 6.7574  | 7.0811 | C6        | 13.6515 | 6.0296  | 7.1489  |
| H20  | 13.9069 | 7.6279  | 7.0404 | C7        | 14.9864 | 6.4996  | 7.0906  |
| H21  | 14.2231 | 6.3002  | 8.2034 | C8        | 15.6546 | 6.8255  | 8.2624  |
| H22  | 13.3064 | 3.9618  | 2.2137 | H9        | 16.6828 | 7.1928  | 8.1917  |
| H23  | 11.8864 | 3.7516  | 3.2526 | C10       | 15.0663 | 6.6857  | 9.5189  |
| H24  | 12.1862 | 5.3740  | 2.5336 | C11       | 13.7709 | 6.1788  | 9.5676  |
| H25  | 11.2577 | 6.6987  | 7.0189 | H12       | 13.2763 | 6.0673  | 10.5376 |
| H26  | 10.4532 | 8.2976  | 7.3852 | C13       | 13.0466 | 5.8601  | 8.4225  |
| H27  | 9.6330  | 7.1105  | 6.3618 | C14       | 15.7111 | 6.5629  | 5.7867  |
| H28  | 13.8911 | 7.4268  | 2.3918 | H15       | 16.7167 | 6.9834  | 5.9187  |
| H29  | 12.8440 | 8.5506  | 1.4096 | H16       | 15.1748 | 7.1717  | 5.0463  |

|     |         |         |         |           |         |         |         |
|-----|---------|---------|---------|-----------|---------|---------|---------|
| H17 | 15.8071 | 5.5573  | 5.3523  | H88       | 13.5586 | 8.6081  | -0.2617 |
| C18 | 15.7778 | 7.1351  | 10.7592 | H89       | 14.0129 | 7.4156  | 0.9667  |
| H19 | 15.4127 | 6.6081  | 11.6513 | H90       | 13.6272 | 9.0547  | 1.4864  |
| H20 | 15.6292 | 8.2124  | 10.9394 | O91       | 13.2020 | 10.9598 | 5.0618  |
| H21 | 16.8625 | 6.9713  | 10.6905 | O92       | 11.7732 | 2.7545  | 4.2671  |
| C22 | 11.6159 | 5.4426  | 8.5664  | C93       | 11.6794 | 10.5335 | 2.4978  |
| H23 | 10.9589 | 6.3005  | 8.3659  | H94       | 10.5818 | 10.4119 | 2.5924  |
| H24 | 11.4117 | 5.1031  | 9.5905  | H95       | 11.9504 | 11.5207 | 2.8928  |
| H25 | 11.3424 | 4.6620  | 7.8411  | H96       | 11.8900 | 10.5249 | 1.4119  |
| C26 | 12.2726 | 4.8621  | 2.5947  | C97       | 13.2907 | 3.1803  | 6.8334  |
| C27 | 13.5200 | 5.0641  | 1.9710  | H98       | 14.3887 | 3.3012  | 6.7410  |
| C28 | 13.6640 | 4.8019  | 0.6089  | H99       | 13.0780 | 3.1885  | 7.9189  |
| H29 | 14.6324 | 4.9982  | 0.1392  | H100      | 13.0199 | 2.1934  | 6.4372  |
| C30 | 12.6185 | 4.3088  | -0.1602 | 52        |         |         |         |
| C31 | 11.4206 | 4.0261  | 0.4912  | M17       |         |         |         |
| H32 | 10.5853 | 3.6146  | -0.0833 | N1        | 11.5913 | 8.6073  | 5.7087  |
| C33 | 11.2268 | 4.2770  | 1.8459  | N2        | 11.4789 | 8.0534  | 3.6551  |
| C34 | 14.7066 | 5.5142  | 2.7562  | C3        | 11.6104 | 7.5125  | 4.9185  |
| H35 | 15.6176 | 5.4680  | 2.1449  | C4        | 11.4967 | 9.8451  | 4.9954  |
| H36 | 14.8459 | 4.8789  | 3.6409  | C5        | 11.4142 | 9.4913  | 3.6199  |
| H37 | 14.5878 | 6.5409  | 3.1297  | C6        | 11.9324 | 8.4660  | 7.0853  |
| C38 | 12.7437 | 4.1477  | -1.6456 | C7        | 10.9361 | 8.4585  | 8.0643  |
| H39 | 12.1828 | 3.2762  | -2.0110 | C8        | 11.3085 | 8.2465  | 9.3883  |
| H40 | 13.7910 | 4.0300  | -1.9541 | H9        | 10.5352 | 8.2370  | 10.1597 |
| H41 | 12.3462 | 5.0282  | -2.1740 | C10       | 12.6402 | 8.0538  | 9.7537  |
| C42 | 9.9010  | 3.9205  | 2.4471  | C11       | 13.6093 | 8.0647  | 8.7554  |
| H43 | 9.1059  | 3.9852  | 1.6910  | H12       | 14.6566 | 7.9059  | 9.0216  |
| H44 | 9.6520  | 4.5808  | 3.2820  | C13       | 13.2744 | 8.2677  | 7.4171  |
| H45 | 9.9485  | 2.9094  | 2.8638  | C14       | 9.5143  | 8.7063  | 7.6783  |
| N46 | 12.8997 | 8.6187  | 5.3490  | H15       | 8.8322  | 8.5161  | 8.5153  |
| N47 | 11.9757 | 8.1580  | 3.3278  | H16       | 9.2216  | 8.0786  | 6.8270  |
| C48 | 12.3913 | 7.5379  | 4.5460  | H17       | 9.4160  | 9.7540  | 7.3645  |
| C49 | 12.9082 | 9.8643  | 4.5515  | C18       | 13.0180 | 7.8653  | 11.1943 |
| C50 | 12.4229 | 9.5311  | 3.3033  | H19       | 13.9861 | 7.3597  | 11.2926 |
| C51 | 12.7038 | 8.8534  | 6.7354  | H20       | 12.2704 | 7.2692  | 11.7325 |
| C52 | 11.4563 | 8.6525  | 7.3600  | H21       | 13.0992 | 8.8266  | 11.7203 |
| C53 | 11.3144 | 8.9128  | 8.7229  | C22       | 14.3175 | 8.2466  | 6.3420  |
| H54 | 10.3462 | 8.7174  | 9.1936  | H23       | 14.1582 | 7.3869  | 5.6776  |
| C55 | 12.3621 | 9.4032  | 9.4912  | H24       | 15.3265 | 8.1893  | 6.7665  |
| C56 | 13.5592 | 9.6856  | 8.8384  | H25       | 14.2493 | 9.1426  | 5.7109  |
| H57 | 14.3957 | 10.0949 | 9.4125  | C26       | 11.4321 | 7.2424  | 2.4949  |
| C58 | 13.7510 | 9.4365  | 7.4833  | C27       | 10.3752 | 6.3367  | 2.3309  |
| C59 | 10.2683 | 8.2051  | 6.5752  | C28       | 10.3570 | 5.5243  | 1.1984  |
| H60 | 9.3578  | 8.2523  | 7.1873  | H29       | 9.5367  | 4.8140  | 1.0732  |
| H61 | 10.3853 | 7.1784  | 6.2009  | C30       | 11.3506 | 5.5978  | 0.2261  |
| H62 | 10.1295 | 8.8412  | 5.6909  | C31       | 12.3908 | 6.5035  | 0.4164  |
| C63 | 12.2402 | 9.5607  | 10.9773 | H32       | 13.1903 | 6.5631  | -0.3256 |
| H64 | 12.8050 | 10.4292 | 11.3439 | C33       | 12.4544 | 7.3270  | 1.5388  |
| H65 | 12.6357 | 8.6773  | 11.5022 | C34       | 9.2893  | 6.2368  | 3.3583  |
| H66 | 11.1939 | 9.6813  | 11.2881 | H35       | 8.5244  | 5.5128  | 3.0543  |
| C67 | 15.0760 | 9.7921  | 6.8804  | H36       | 8.8074  | 7.2105  | 3.5156  |
| H68 | 15.8724 | 9.7258  | 7.6350  | H37       | 9.7086  | 5.9459  | 4.3292  |
| H69 | 15.0291 | 10.8038 | 6.4650  | C38       | 11.2936 | 4.7417  | -1.0058 |
| H70 | 15.3229 | 9.1327  | 6.0443  | H39       | 12.2951 | 4.4243  | -1.3222 |
| C71 | 11.3204 | 7.6837  | 2.1821  | H40       | 10.8462 | 5.2792  | -1.8534 |
| C72 | 9.9861  | 7.2117  | 2.2413  | H41       | 10.6915 | 3.8402  | -0.8408 |
| C73 | 9.3179  | 6.8836  | 1.0698  | C42       | 13.6040 | 8.2653  | 1.7326  |
| H74 | 8.2902  | 6.5149  | 1.1411  | H43       | 14.4003 | 8.0698  | 1.0051  |
| C75 | 9.9061  | 7.0229  | -0.1870 | H44       | 14.0190 | 8.1688  | 2.7447  |
| C76 | 11.2007 | 7.5318  | -0.2361 | H45       | 13.2608 | 9.3024  | 1.6325  |
| H77 | 11.6950 | 7.6427  | -1.2063 | O46       | 11.3023 | 10.1315 | 2.5666  |
| C78 | 11.9246 | 7.8529  | 0.9083  | C47       | 11.3590 | 11.1158 | 5.6150  |
| C79 | 9.2625  | 7.1476  | 3.5459  | C48       | 11.3698 | 12.3243 | 4.6972  |
| H80 | 8.2571  | 6.7264  | 3.4148  | O49       | 11.2475 | 11.2927 | 6.8392  |
| H81 | 9.1664  | 8.1529  | 3.9810  | H50       | 10.5779 | 13.0117 | 5.0162  |
| H82 | 9.8001  | 6.5387  | 4.2854  | H51       | 12.3229 | 12.8527 | 4.8297  |
| C83 | 9.1964  | 6.5692  | -1.4267 | H52       | 11.2551 | 12.0547 | 3.6432  |
| H84 | 9.5647  | 7.0912  | -2.3204 | 104       |         |         |         |
| H85 | 8.1117  | 6.7353  | -1.3615 | D17 dimer |         |         |         |
| H86 | 9.3436  | 5.4908  | -1.6014 | N1        | 12.3383 | 5.6180  | 6.1020  |
| C87 | 13.3546 | 8.2717  | 0.7634  | N2        | 11.8149 | 5.2499  | 3.9217  |

|     |         |         |         |      |         |         |         |
|-----|---------|---------|---------|------|---------|---------|---------|
| C3  | 12.0235 | 6.2752  | 4.8859  | H74  | 7.2940  | 6.9767  | 2.0223  |
| C4  | 12.2758 | 4.1840  | 5.9340  | C75  | 8.5801  | 7.5868  | 0.4179  |
| C5  | 11.9512 | 3.9562  | 4.5849  | C76  | 9.8887  | 7.9385  | 0.1087  |
| C6  | 12.3047 | 6.0326  | 7.4621  | H77  | 10.1703 | 8.0885  | -0.9371 |
| C7  | 13.4617 | 5.8481  | 8.2363  | C78  | 10.8788 | 8.0691  | 1.0787  |
| C8  | 13.4059 | 6.0947  | 9.6057  | C79  | 8.8219  | 7.0269  | 4.1404  |
| H9  | 14.3167 | 5.9729  | 10.1973 | H80  | 7.8129  | 6.5973  | 4.1079  |
| C10 | 12.2324 | 6.4952  | 10.2346 | H81  | 8.8043  | 7.8551  | 4.8557  |
| C11 | 11.0813 | 6.6033  | 9.4616  | H82  | 9.5026  | 6.2668  | 4.5397  |
| H12 | 10.1369 | 6.8818  | 9.9368  | C83  | 7.5518  | 7.3841  | -0.6557 |
| C13 | 11.0923 | 6.3580  | 8.0913  | H84  | 7.6975  | 8.0793  | -1.4927 |
| C14 | 14.7349 | 5.3508  | 7.6270  | H85  | 6.5336  | 7.5269  | -0.2715 |
| H15 | 15.5814 | 5.5091  | 8.3069  | H86  | 7.5984  | 6.3665  | -1.0718 |
| H16 | 14.9532 | 5.8559  | 6.6800  | C87  | 12.2746 | 8.3341  | 0.5980  |
| H17 | 14.6403 | 4.2801  | 7.4092  | H88  | 12.4424 | 7.8086  | -0.3521 |
| C18 | 12.2154 | 6.8383  | 11.6943 | H89  | 13.0184 | 7.9755  | 1.3172  |
| H19 | 12.9534 | 6.2537  | 12.2584 | H90  | 12.4443 | 9.4063  | 0.4650  |
| H20 | 11.2273 | 6.6616  | 12.1394 | O91  | 11.7736 | 10.3434 | 2.4163  |
| H21 | 12.4530 | 7.9014  | 11.8516 | O92  | 12.4498 | 3.4235  | 6.8928  |
| C22 | 9.8160  | 6.4021  | 7.3195  | C93  | 13.6613 | 10.8823 | 4.7580  |
| H23 | 8.9554  | 6.4953  | 7.9929  | O94  | 14.3317 | 11.0804 | 5.7936  |
| H24 | 9.6917  | 5.4960  | 6.7109  | C95  | 11.8293 | 2.6786  | 3.9836  |
| H25 | 9.8091  | 7.2551  | 6.6316  | O96  | 11.5555 | 2.4384  | 2.7926  |
| C26 | 12.4978 | 5.3241  | 2.6561  | C97  | 13.6851 | 11.9749 | 3.6918  |
| C27 | 13.8765 | 5.6032  | 2.5774  | H98  | 14.4291 | 12.7156 | 4.0065  |
| C28 | 14.5110 | 5.5503  | 1.3366  | H99  | 13.9240 | 11.5867 | 2.6960  |
| H29 | 15.5807 | 5.7690  | 1.2857  | H100 | 12.7025 | 12.4515 | 3.5870  |
| C30 | 13.8258 | 5.2208  | 0.1718  | C101 | 12.0897 | 1.4804  | 4.8948  |
| C31 | 12.4706 | 4.9391  | 0.2744  | H102 | 12.0417 | 0.5857  | 4.2638  |
| H32 | 11.9055 | 4.6762  | -0.6240 | H103 | 13.0594 | 1.5432  | 5.4001  |
| C33 | 11.7912 | 4.9762  | 1.4924  | H104 | 11.3503 | 1.4135  | 5.7012  |
| C34 | 14.6999 | 5.9282  | 3.7883  |      |         |         |         |
| H35 | 15.7679 | 5.9032  | 3.5387  |      |         |         |         |
| H36 | 14.5203 | 5.2028  | 4.5917  |      |         |         |         |
| H37 | 14.4644 | 6.9230  | 4.1932  |      |         |         |         |
| C38 | 14.5180 | 5.2196  | -1.1597 |      |         |         |         |
| H39 | 14.1015 | 4.4567  | -1.8302 |      |         |         |         |
| H40 | 15.5935 | 5.0269  | -1.0550 |      |         |         |         |
| H41 | 14.4116 | 6.1888  | -1.6688 |      |         |         |         |
| C42 | 10.3387 | 4.6125  | 1.4824  |      |         |         |         |
| H43 | 9.8044  | 5.2091  | 0.7303  |      |         |         |         |
| H44 | 9.8755  | 4.7684  | 2.4586  |      |         |         |         |
| H45 | 10.2423 | 3.5484  | 1.2490  |      |         |         |         |
| N46 | 12.6357 | 8.6481  | 5.4131  |      |         |         |         |
| N47 | 11.5307 | 8.2295  | 3.4049  |      |         |         |         |
| C48 | 11.9310 | 7.6299  | 4.6595  |      |         |         |         |
| C49 | 12.8728 | 9.7454  | 4.4780  |      |         |         |         |
| C50 | 12.0681 | 9.5673  | 3.3316  |      |         |         |         |
| C51 | 12.1586 | 9.1343  | 6.6868  |      |         |         |         |
| C52 | 10.8971 | 9.7315  | 6.8592  |      |         |         |         |
| C53 | 10.4980 | 10.1214 | 8.1395  |      |         |         |         |
| H54 | 9.4975  | 10.5439 | 8.2706  |      |         |         |         |
| C55 | 11.3419 | 10.0103 | 9.2388  |      |         |         |         |
| C56 | 12.6334 | 9.5412  | 9.0222  |      |         |         |         |
| H57 | 13.3336 | 9.4874  | 9.8602  |      |         |         |         |
| C58 | 13.0616 | 9.1120  | 7.7682  |      |         |         |         |
| C59 | 9.9908  | 10.0679 | 5.7114  |      |         |         |         |
| H60 | 8.9461  | 10.1325 | 6.0460  |      |         |         |         |
| H61 | 10.0486 | 9.3576  | 4.8866  |      |         |         |         |
| H62 | 10.2715 | 11.0398 | 5.2836  |      |         |         |         |
| C63 | 10.8629 | 10.3462 | 10.6203 |      |         |         |         |
| H64 | 11.6809 | 10.7171 | 11.2516 |      |         |         |         |
| H65 | 10.4462 | 9.4603  | 11.1252 |      |         |         |         |
| H66 | 10.0738 | 11.1094 | 10.6033 |      |         |         |         |
| C67 | 14.4896 | 8.7145  | 7.5778  |      |         |         |         |
| H68 | 14.9376 | 8.3650  | 8.5171  |      |         |         |         |
| H69 | 15.0237 | 9.5915  | 7.1927  |      |         |         |         |
| H70 | 14.5845 | 7.9430  | 6.8102  |      |         |         |         |
| C71 | 10.5498 | 7.8807  | 2.4456  |      |         |         |         |
| C72 | 9.2450  | 7.4400  | 2.7647  |      |         |         |         |
| C73 | 8.2958  | 7.3188  | 1.7501  |      |         |         |         |
